# Supplementary material for: OCT and OCTA in dysthyroid optic neuropathy: a systematic review and meta-analysis
Source: HighWire-hosted journal article supplement (doi:10.1136/bmjophth-2023-001379), 2023-11-01
Supplement: bmjophth-2023-001379supp001_data_supplement.pdf [file bmjophth-2023-001379supp001_data_supplement.pdf]

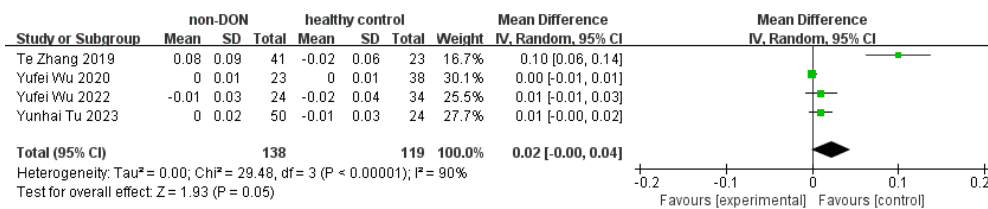

Fig S1. Forest plot of VA between non-DON and DON

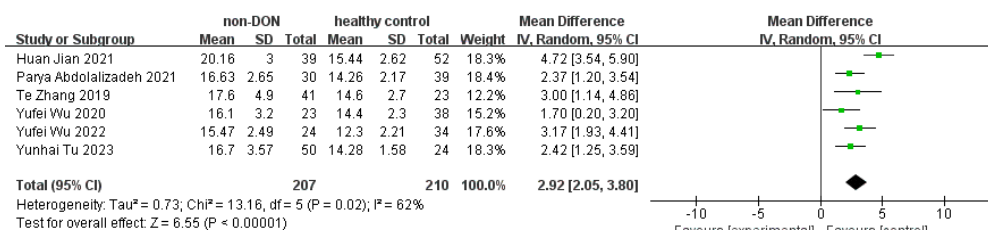

Fig S2. Forest plot of IOP between HC and non-DON

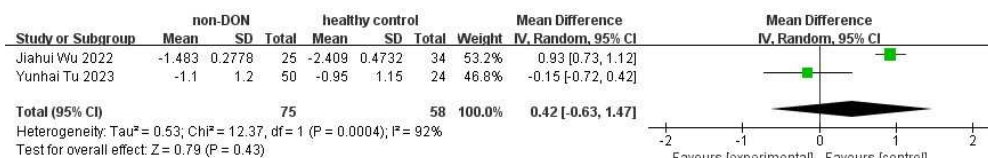

Fig S3. Forest plot of VD-MD between HC and non-DON

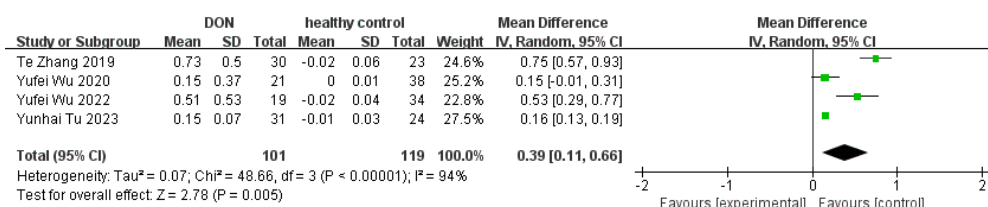

Fig S4. Forest plot of VA between HC and DON

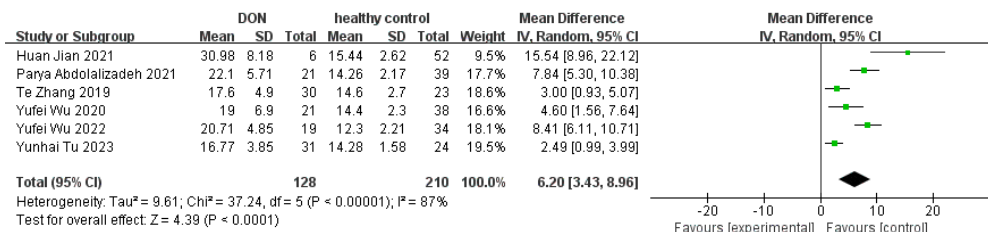

Fig S5. Forest plot of IOP between HC and DON

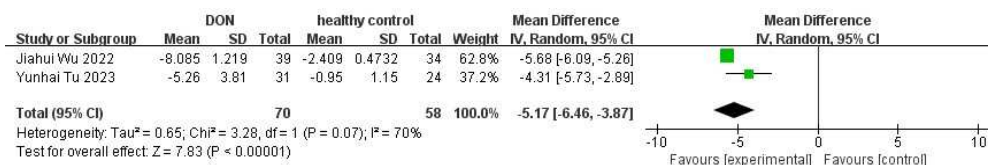

Fig S6. Forest plot of VF-MD between HC and DON

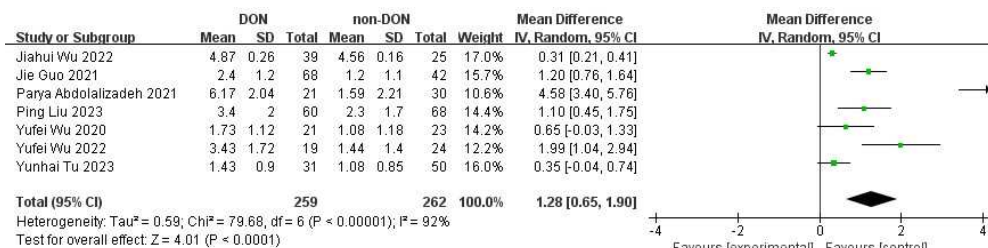

Fig S7. Forest plot of CAS between non-DON and DON

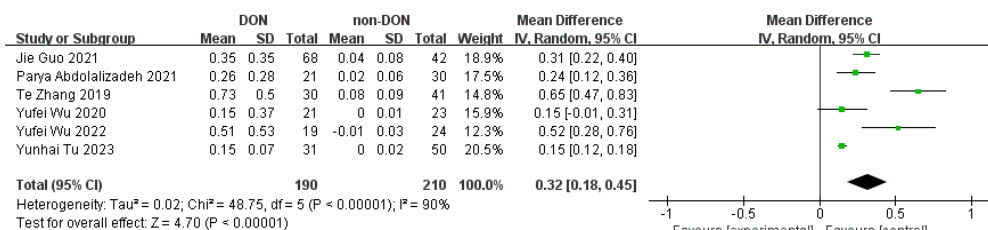

Fig S8. Forest plot of VA between non-DON and DON

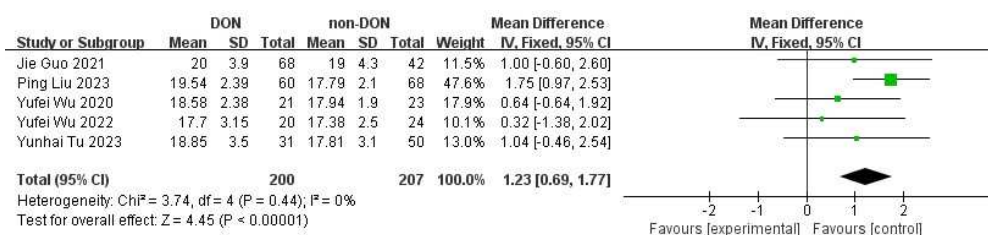

Fig S9. Forest plot of exophthalmos between non-DON and DON

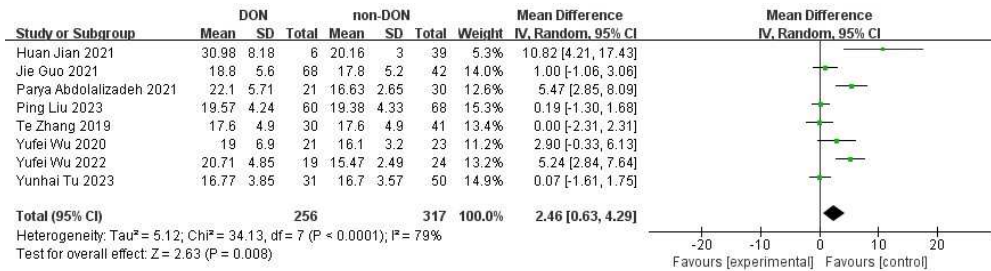

Fig S10. Forest plot of IOP between non-DON and DON

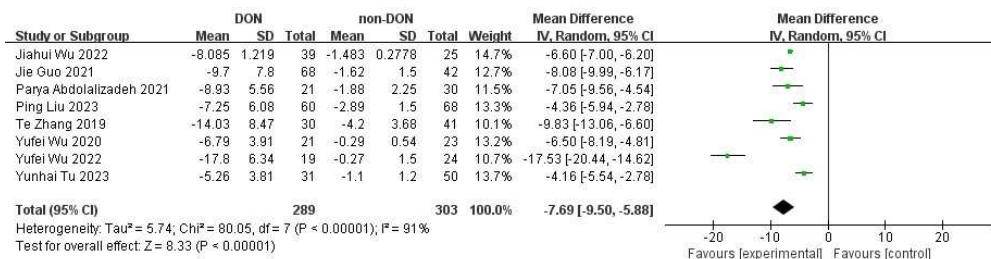

Fig S11. Forest plot of VF-MD between non-DON and DON

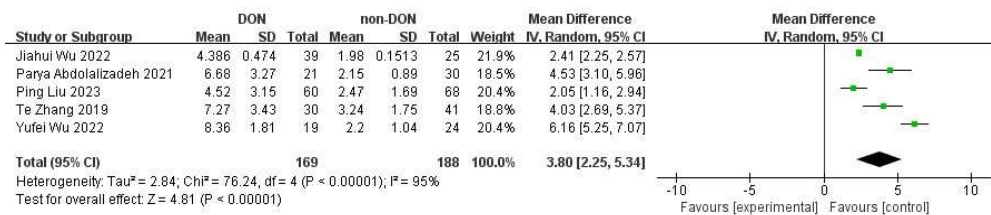

Fig S12. Forest plot of VF-PSD between non-DON and DON

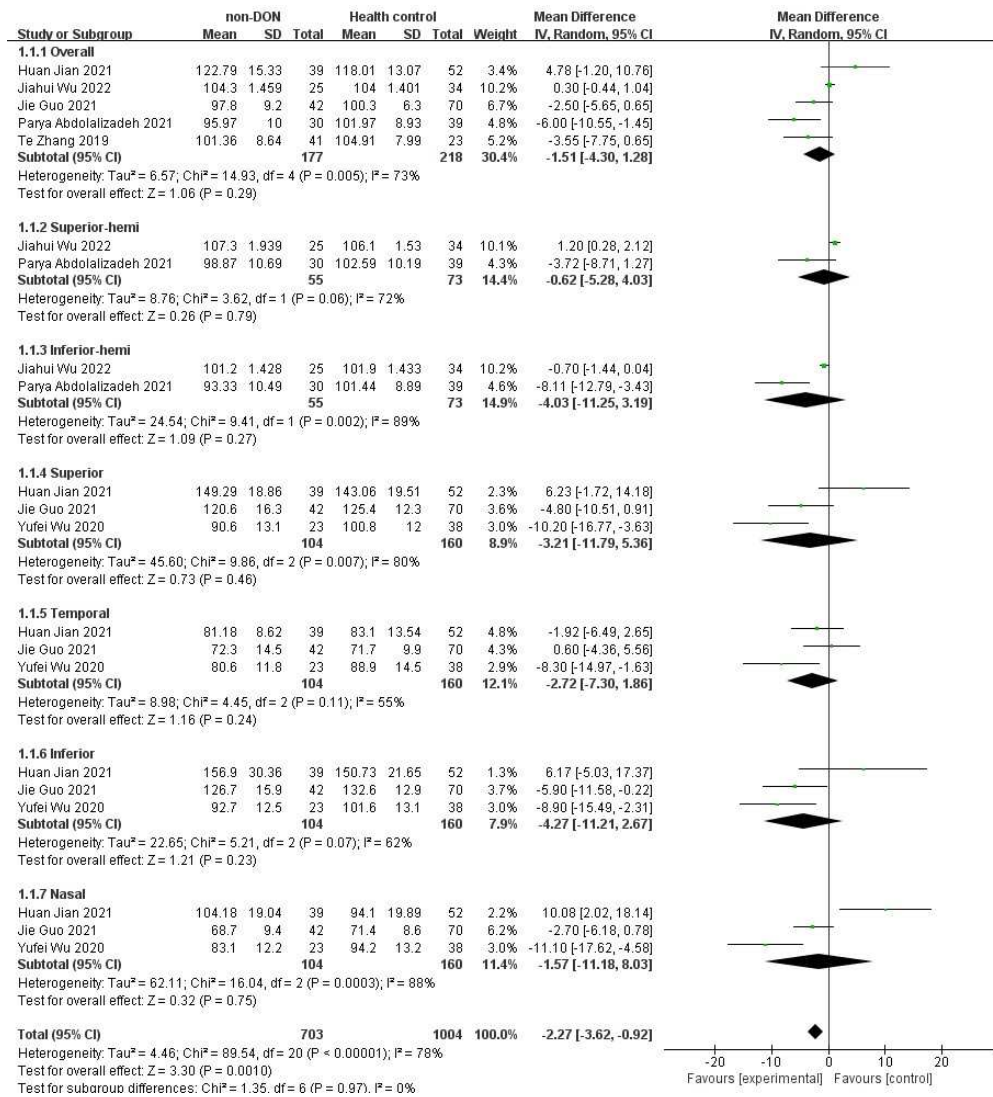

Fig S13. Forest plot of PRNFL between HC and non-DON in OCT

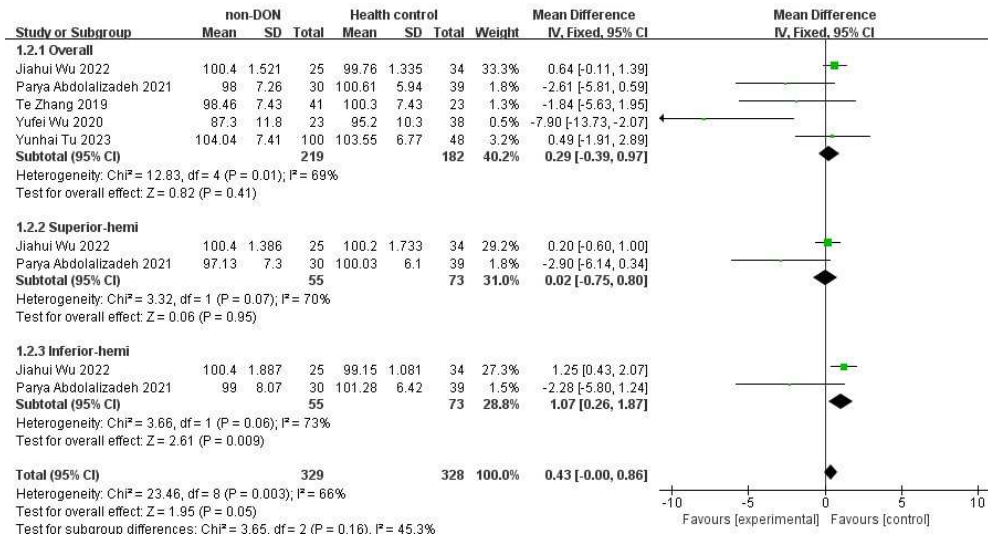

Fig S14. Forest plot of MGGCL between HC and non-DON in OCT

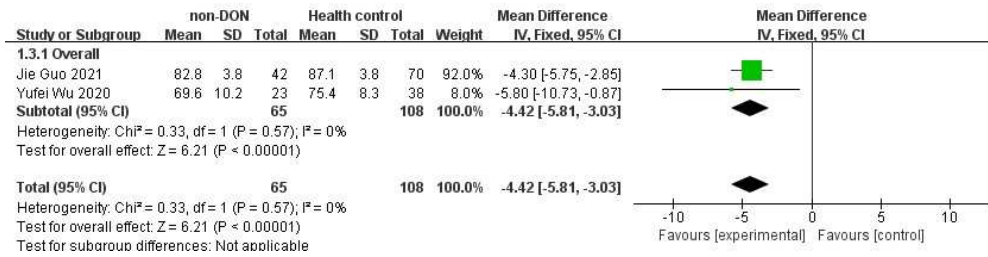

Fig S15. Forest plot of GCL+IPL between HC and non-DON in OCT

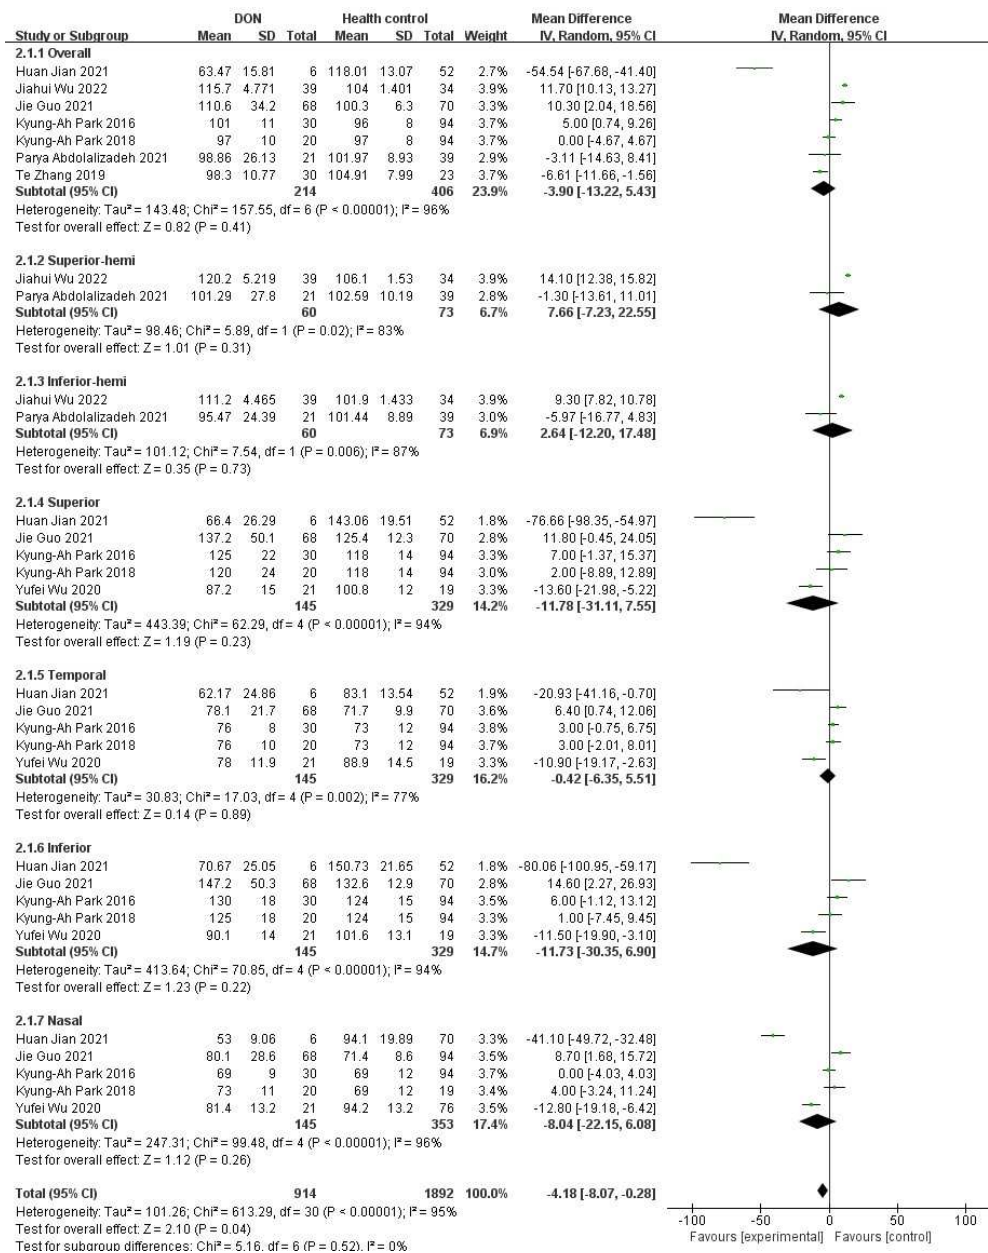

Fig S16. Forest plot of PRNFL between HC and DON in OCT

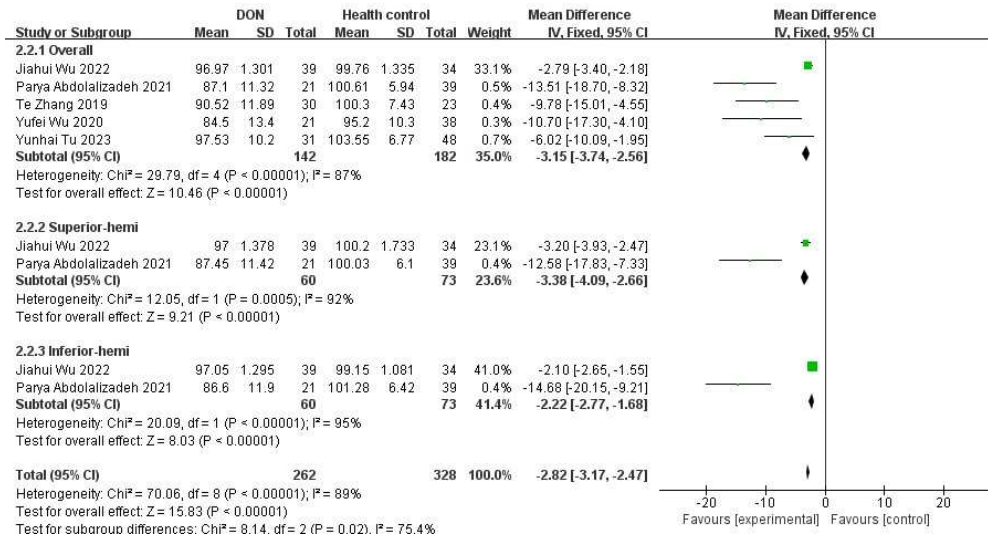

Fig S17. Forest plot of MGGCL between HC and DON in OCT

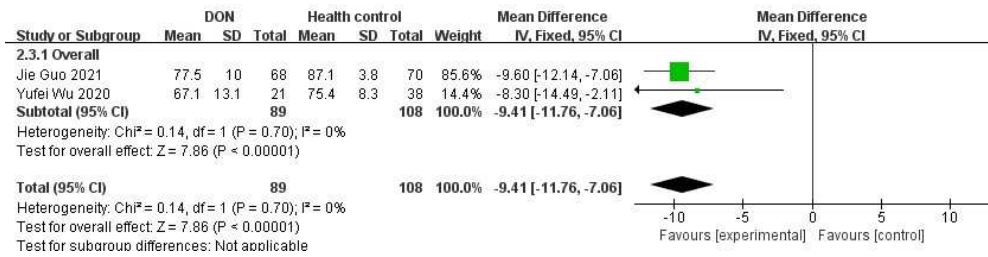

Fig S18. Forest plot of GCL+IPL between HC and DON in OCT

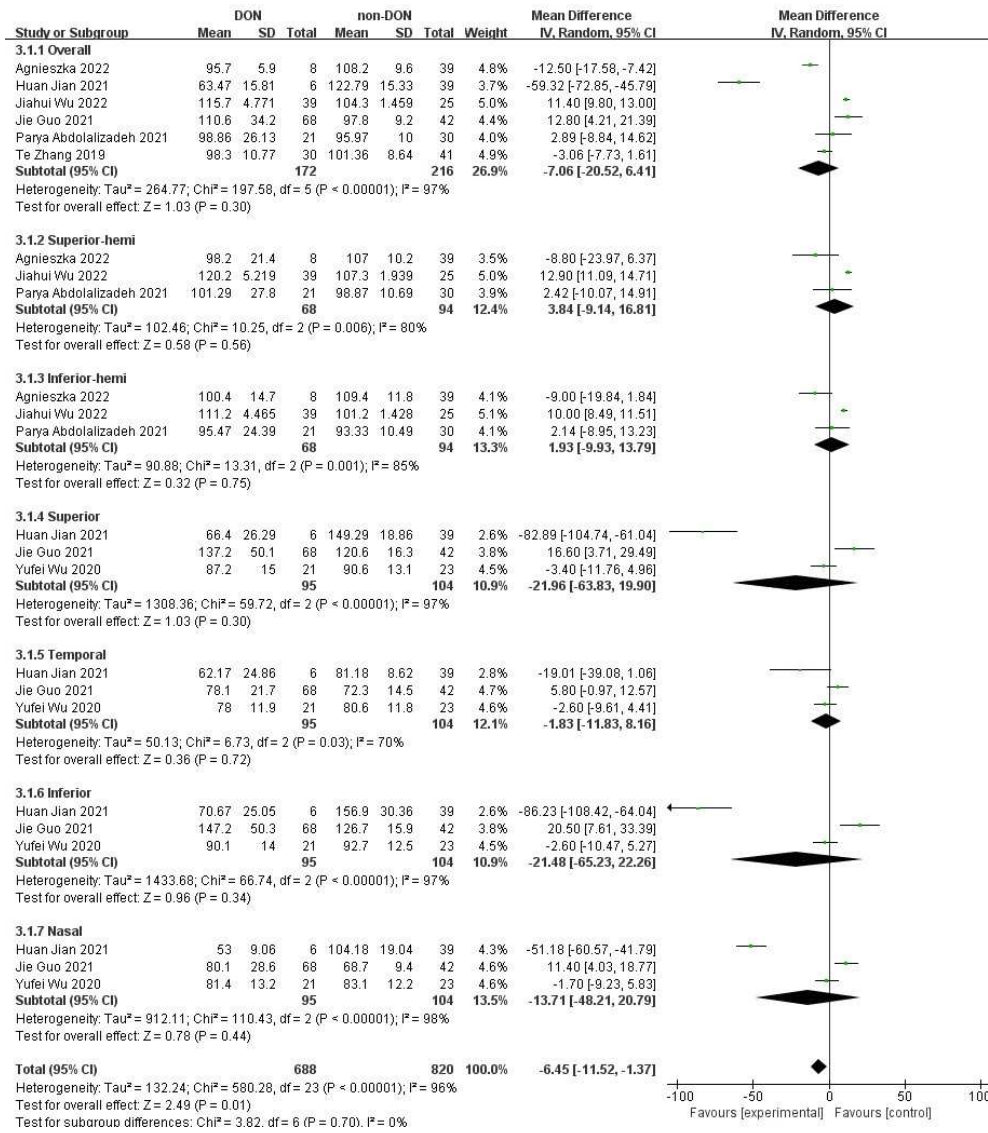

Fig S19. Forest plot of PRNFL between non-DON and DON in OCT



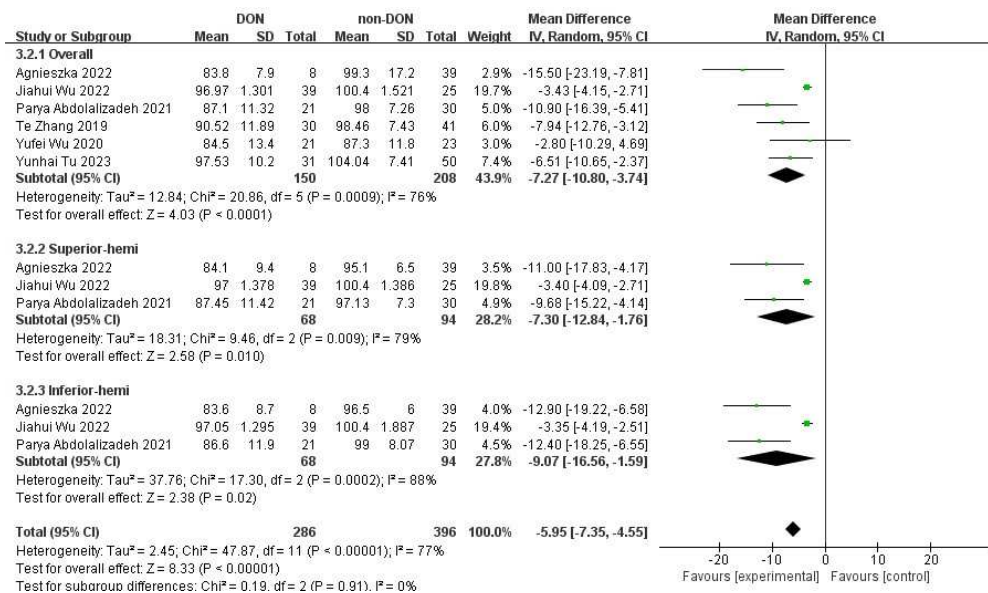

Fig S20. Forest plot of MGGCL between non-DON and DON in OCT

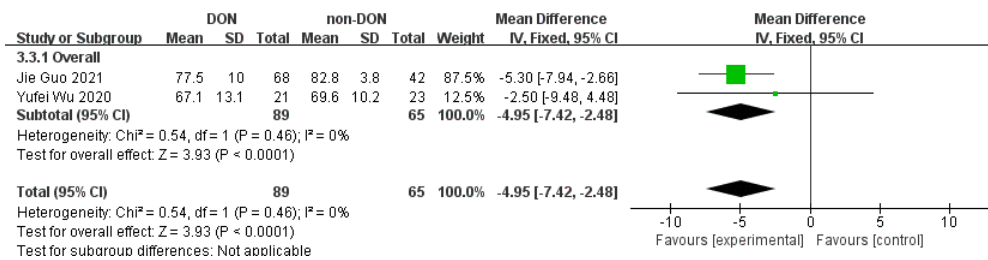

Fig S21. Forest plot of GCL+IPL between non-DON and DON in OCT

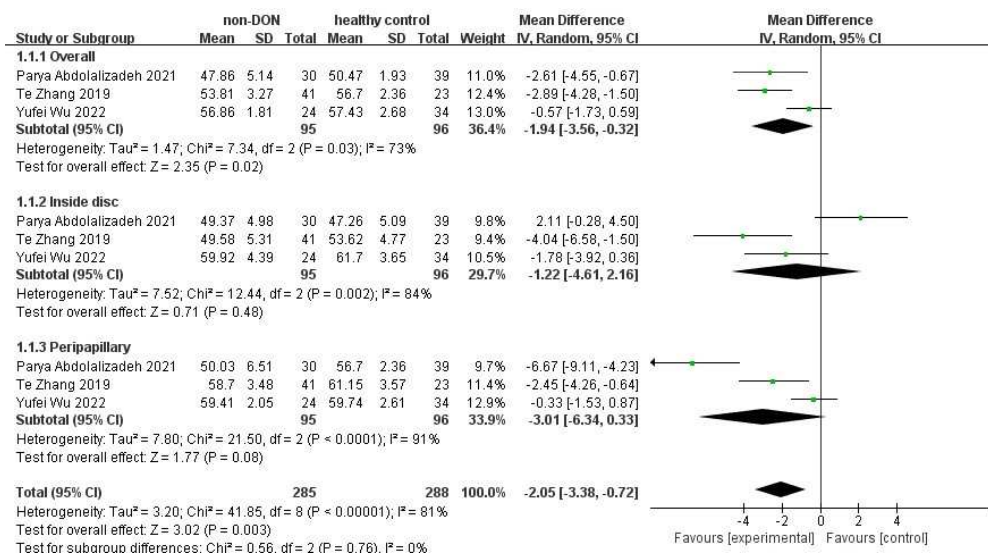

Fig S22. Forest plot of ONH-VD between HC and non-DON in OCTA

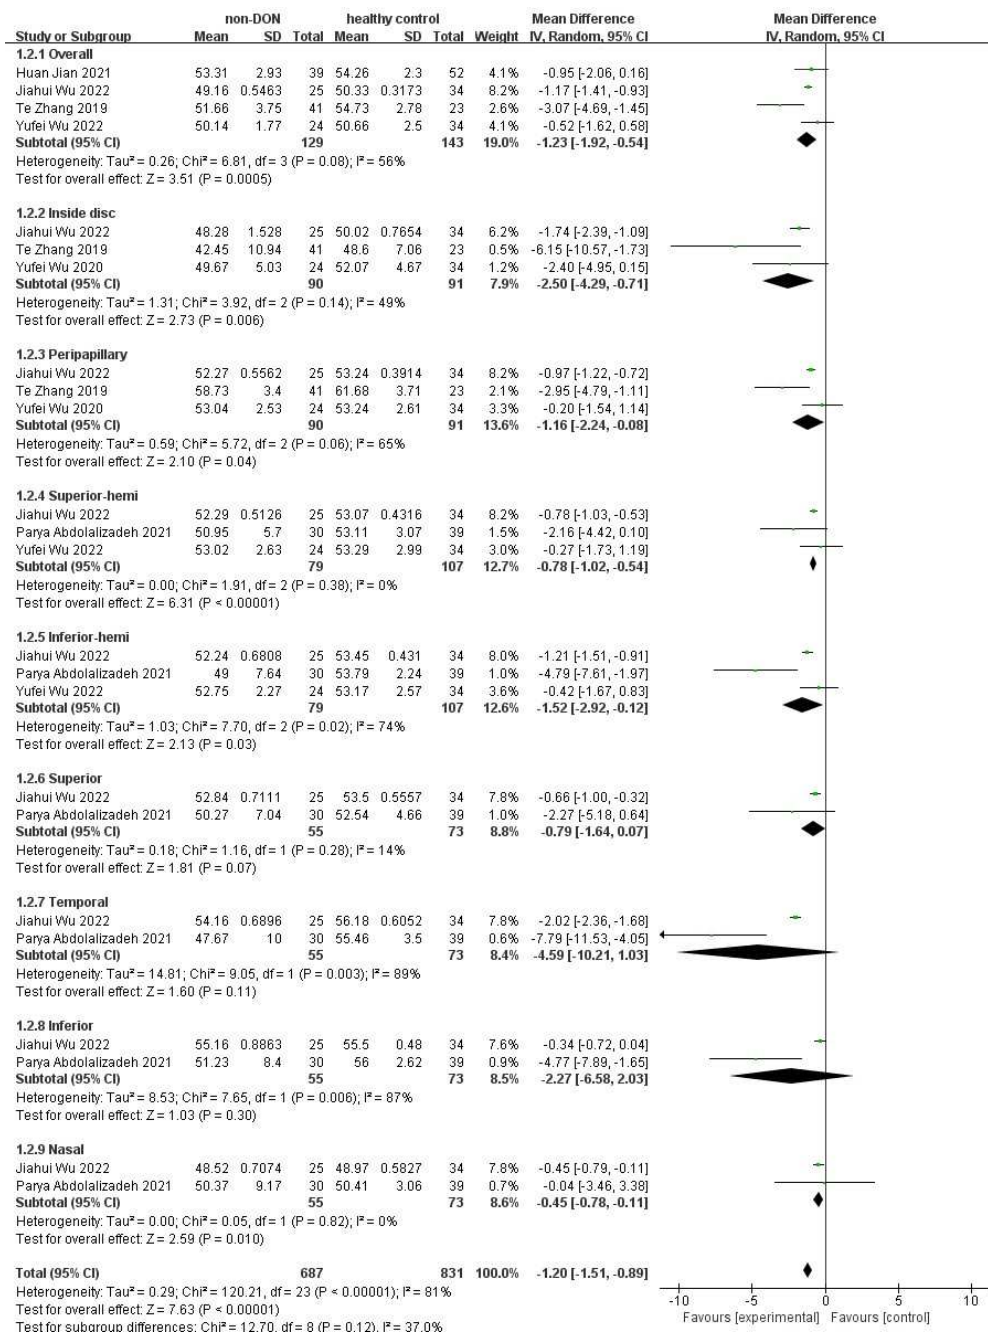

Fig S23. Forest plot of RPC-VD between HC and non-DON in OCTA

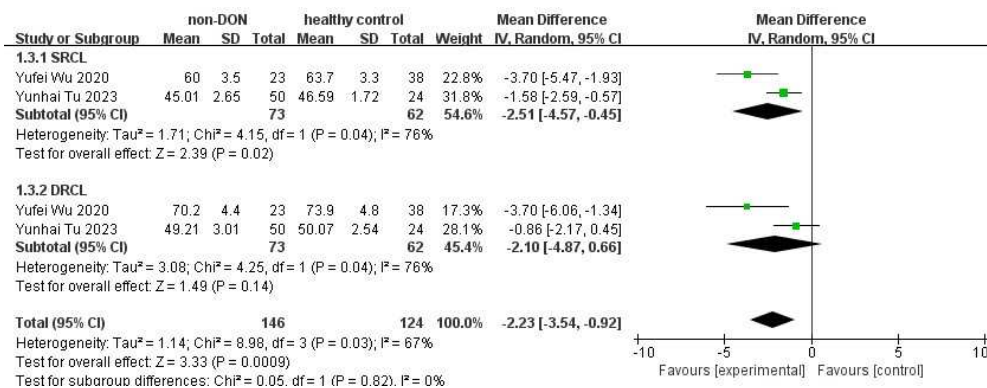

Fig S24. Forest plot of RCL between HC and non-DON in OCTA

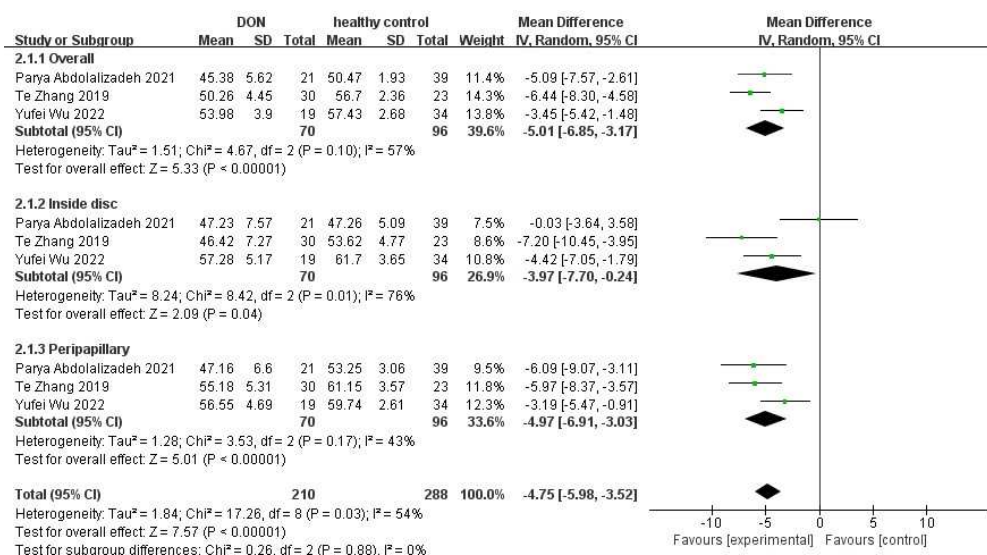

Fig S25. Forest plot of ONH-VD between HC and DON in OCTA

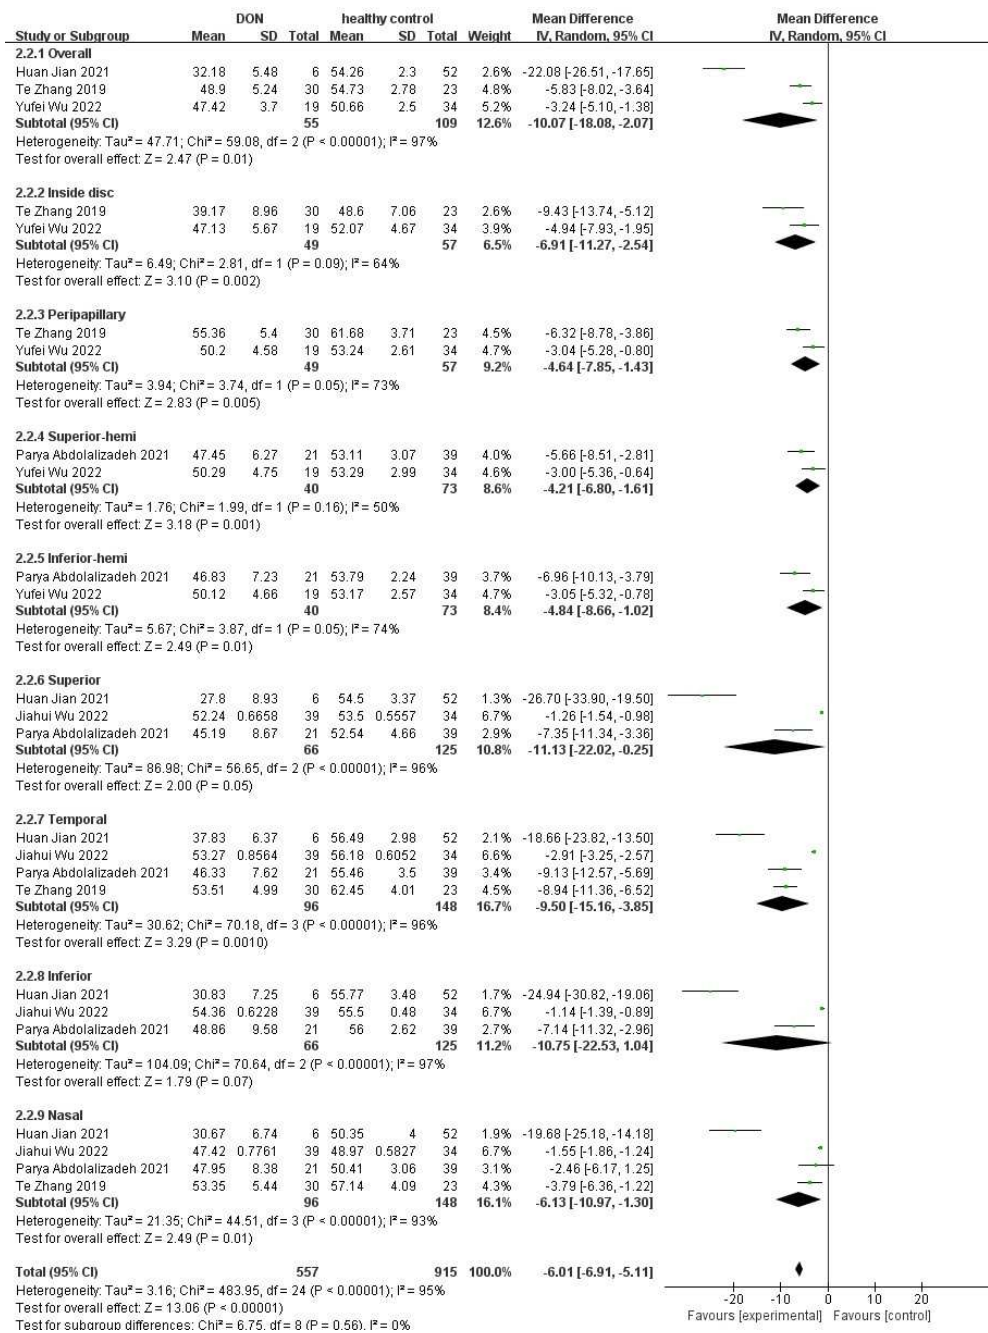

Fig S26.Forest plot of RPC-VD between HC and DON in OCTA

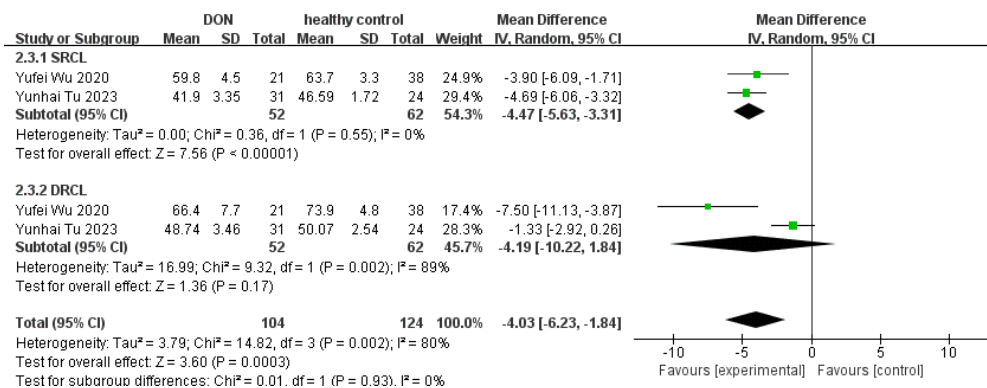

Fig S27. Forest plot of RCL between HC and DON in OCTA

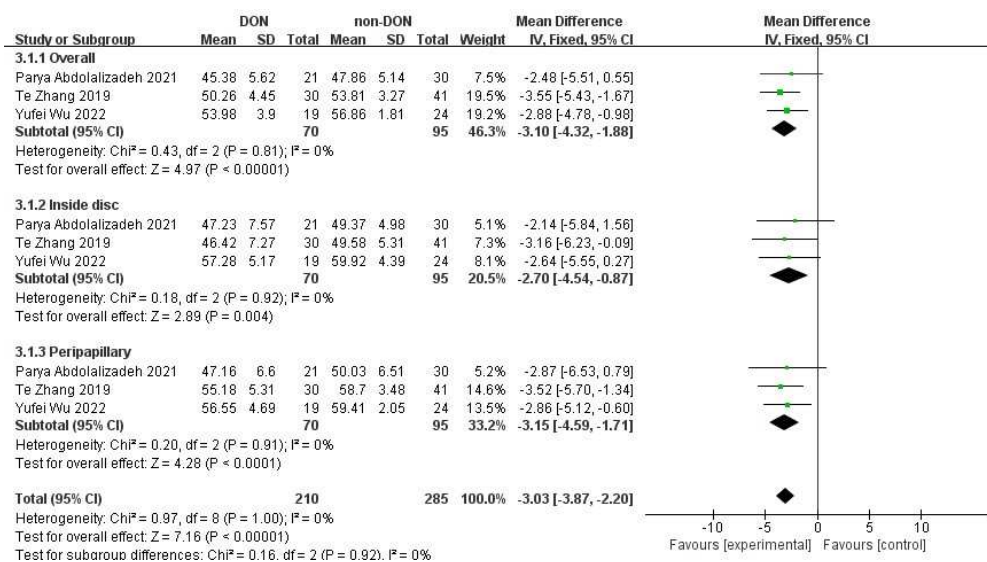

Fig S28. Forest plot of ONH-VD between non-DON and DON in OCTA

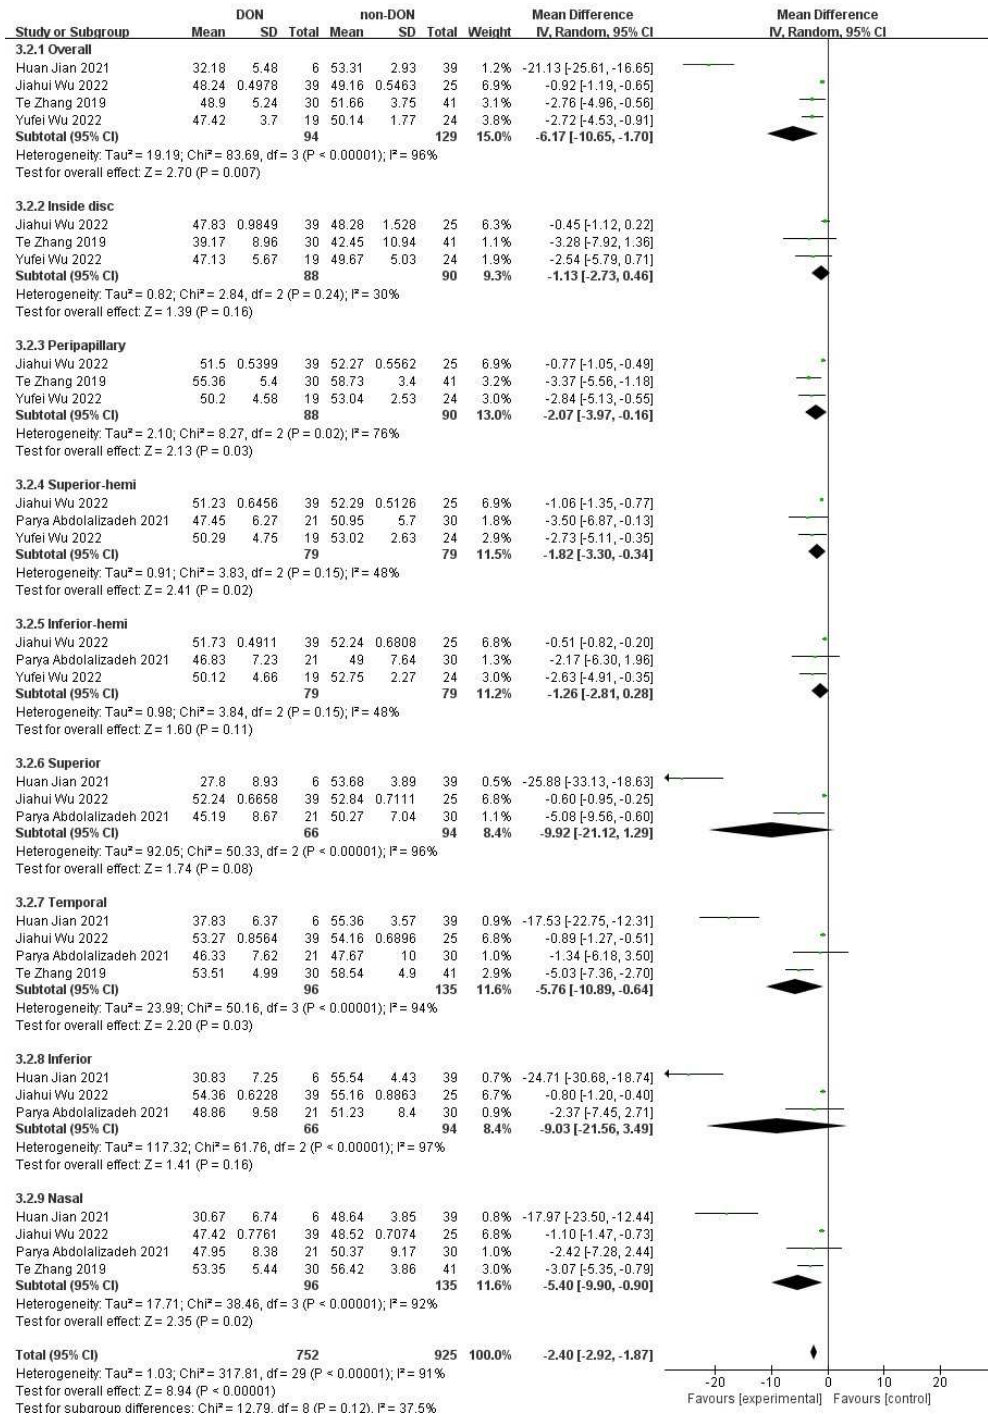

Fig S29. Forest plot of RPC-VD between non-DON and DON in OCTA

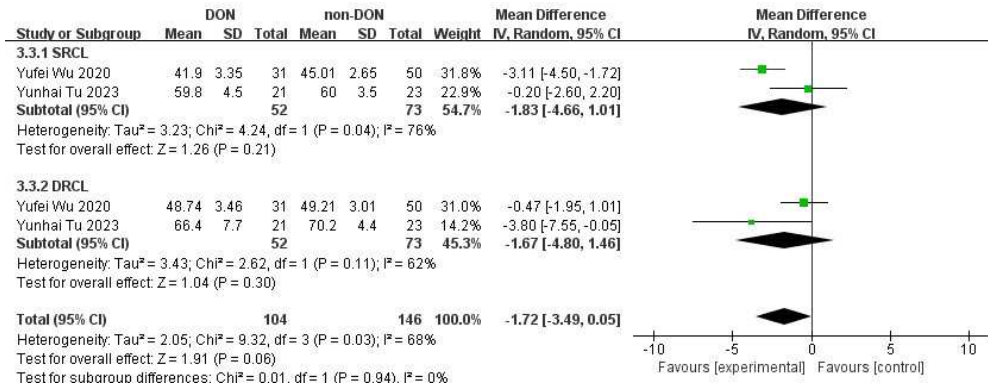

Fig S30. Forest plot of RCL between non-DON and DON in OCTA

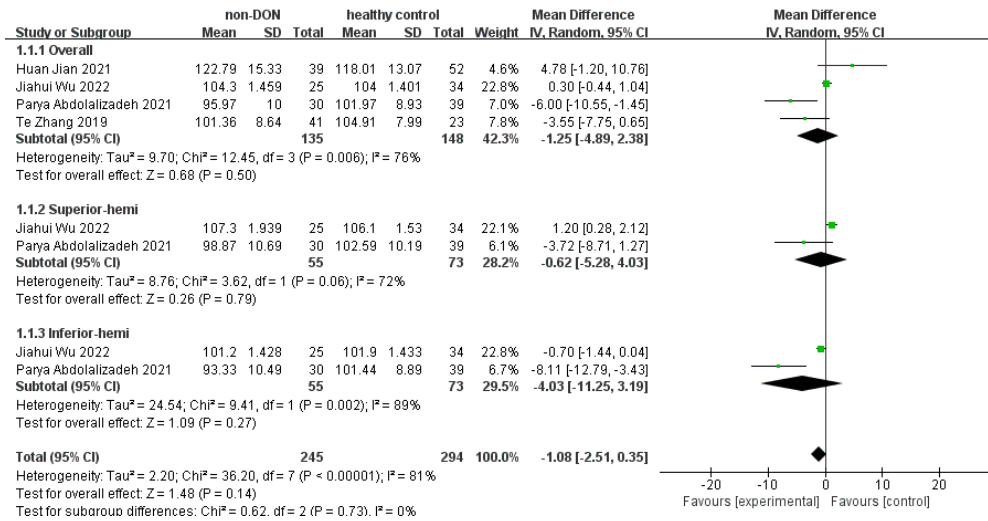

Fig S31. Forest plot of PRNFL between HC and non-DON in OCT of Optovue

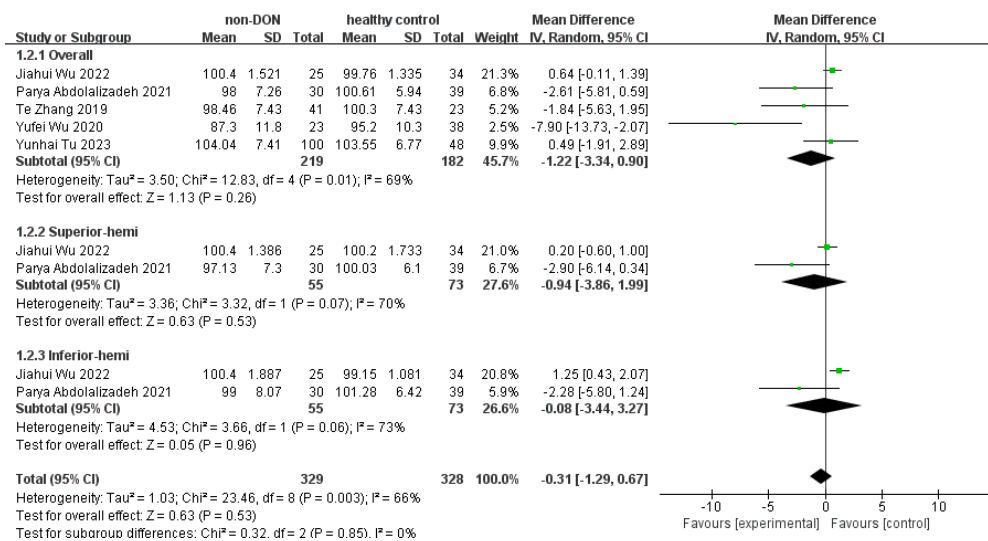

Fig S32. Forest plot of MGGCL between HC and non-DON in OCT of Optovue

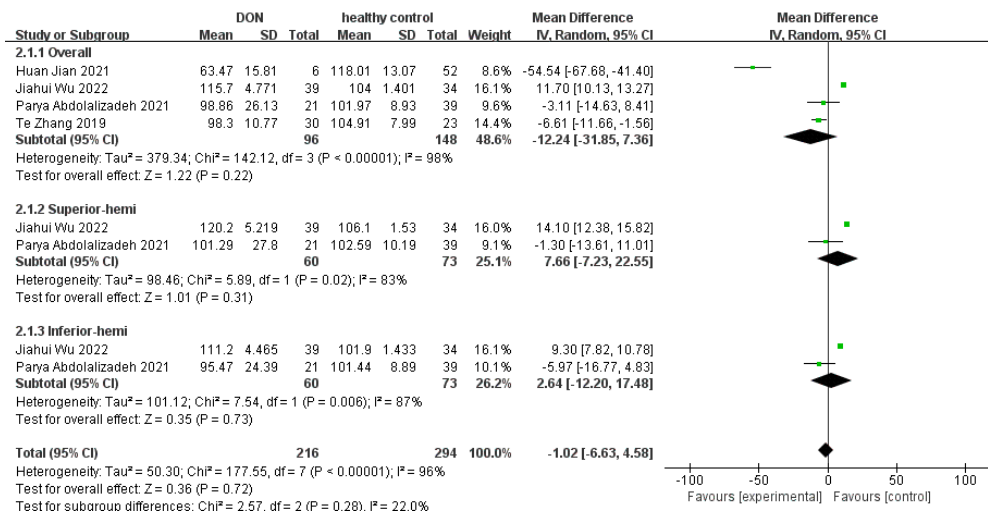

Fig S33. Forest plot of PRNFL between HC and DON in OCT of Optovue

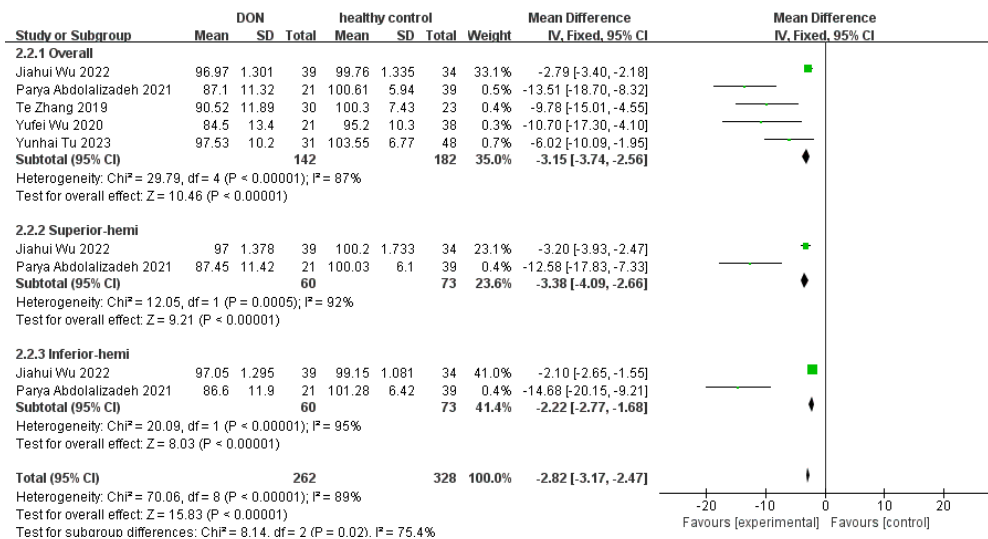

Fig S34. Forest plot of MGGCL between HC and DON in OCT of Optovue



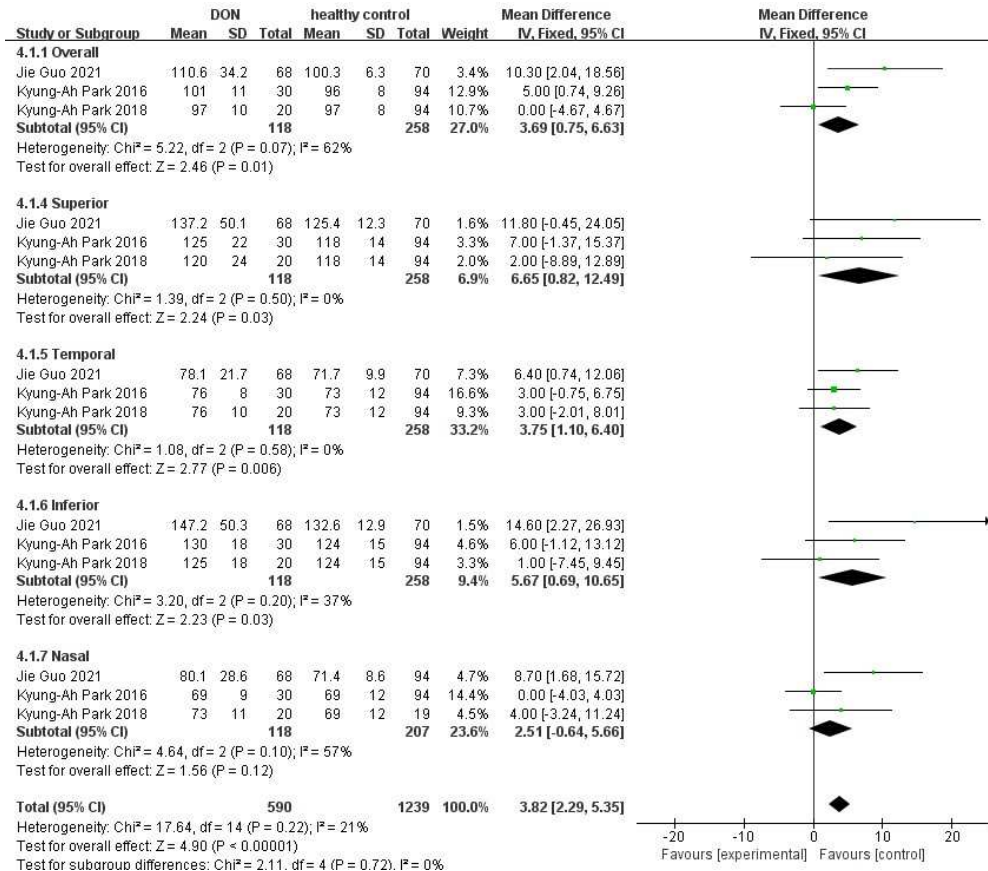

Fig S35. Forest plot of PRNFL between HC and DON in OCT of Carl Zeiss

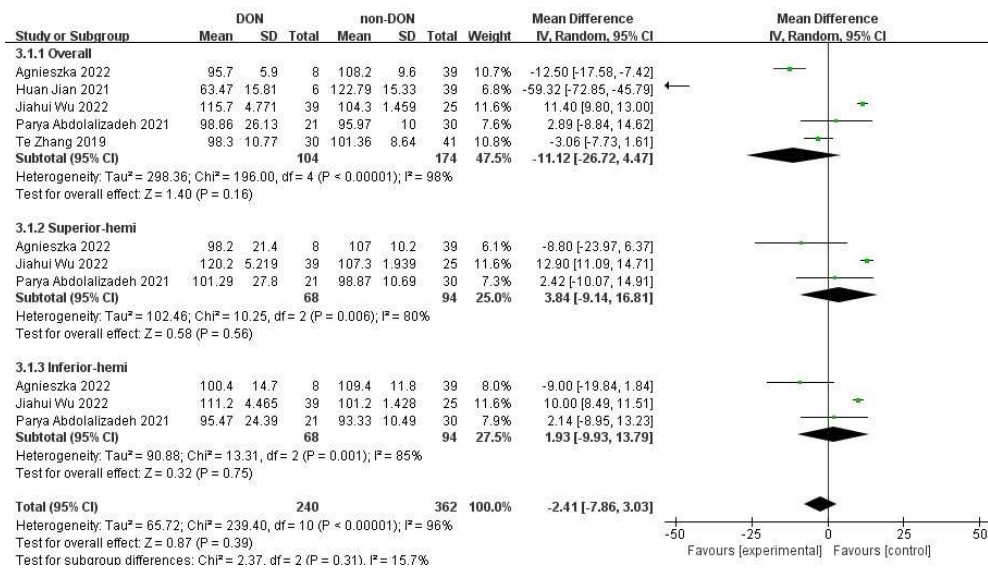

Fig S36. Forest plot of PRNFL between non-DON and DON in OCT of Optovue

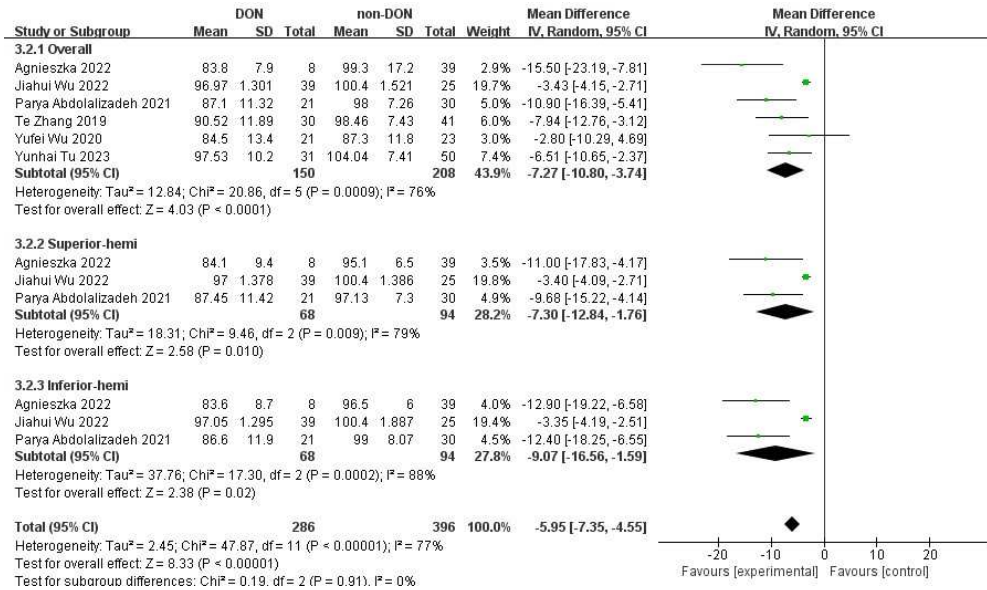

Fig S37. Forest plot of MGGCL between non-DON and DON in OCT of Optovue

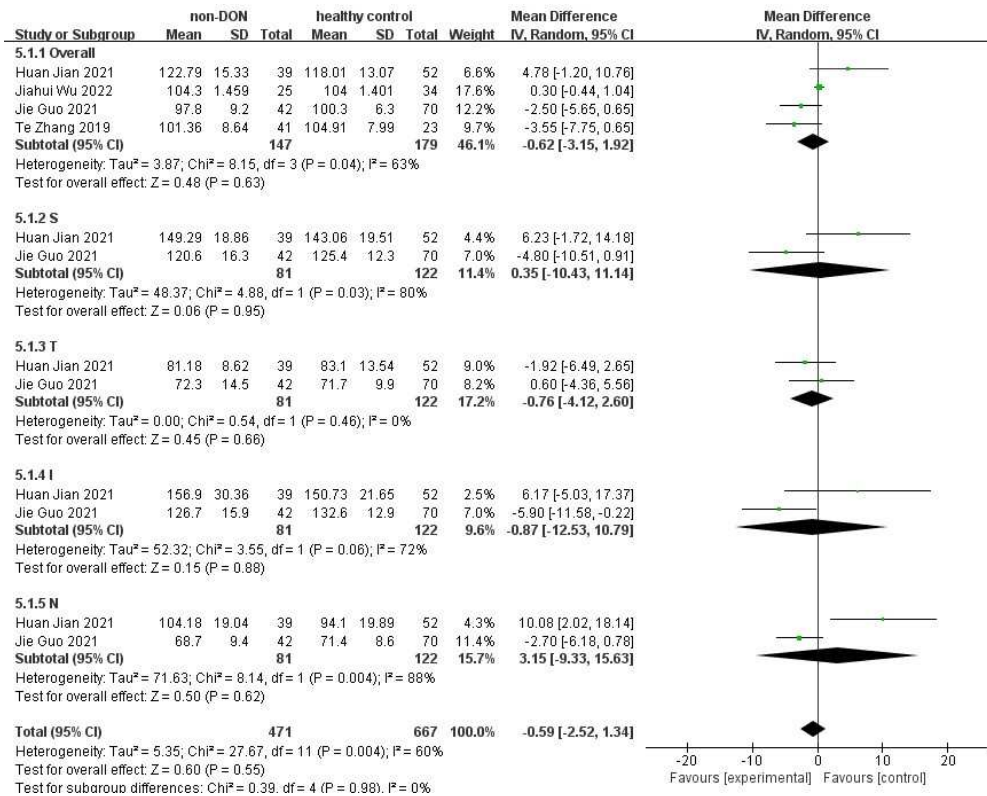

Fig S38. Forest plot of PRNFL between HC and non-DON in OCT of Southeast Asian

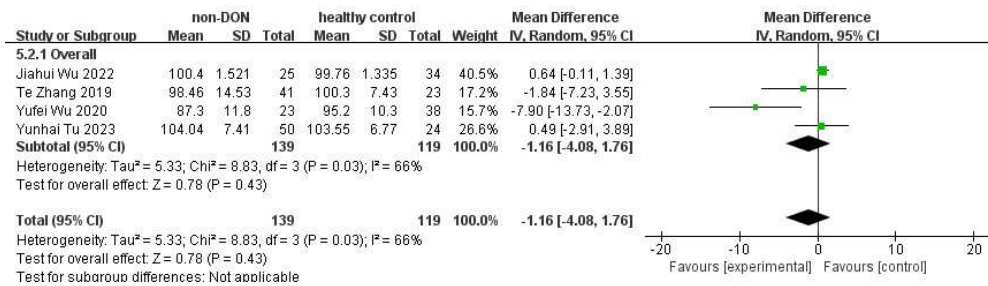

Fig S39. Forest plot of MGGCL between HC and non-DON in OCT of Southeast Asian

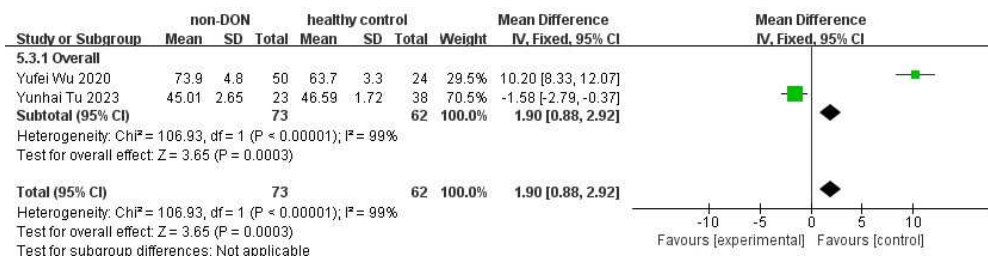

Fig S40. Forest plot of M-SRCL between HC and non-DON in OCT of Southeast Asian

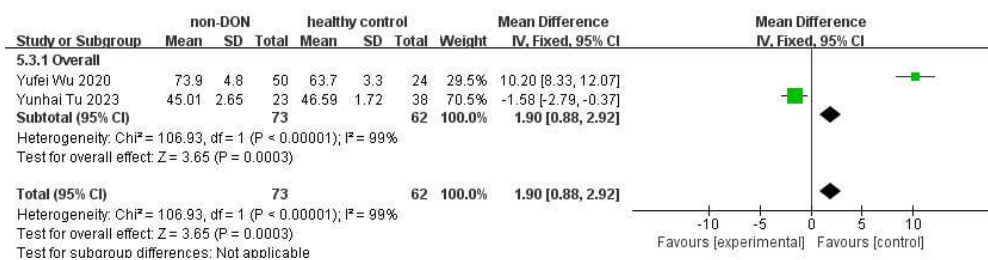

Fig S41. Forest plot of M-DRCL between HC and non-DON in OCT of Southeast Asian

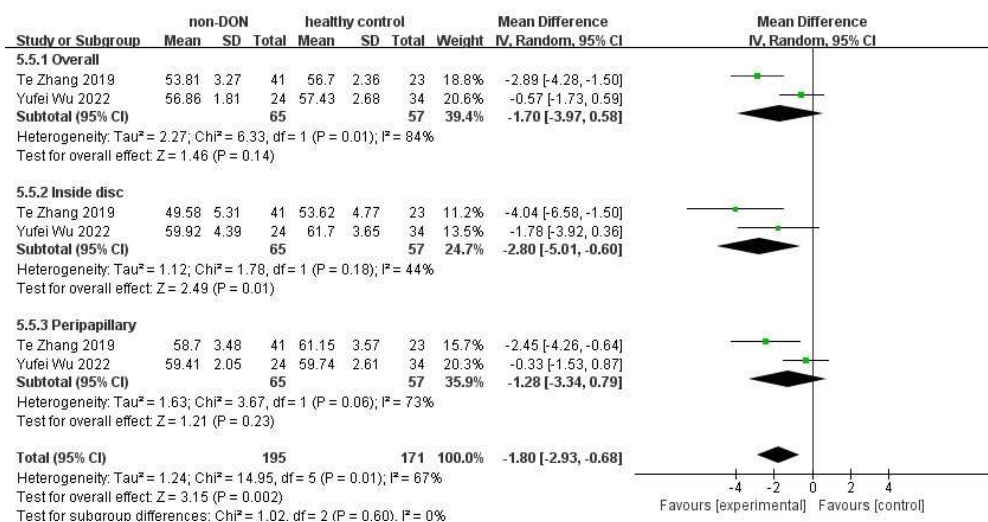

Fig S42. Forest plot of ONH-VD between HC and non-DON in OCTA of Southeast Asian

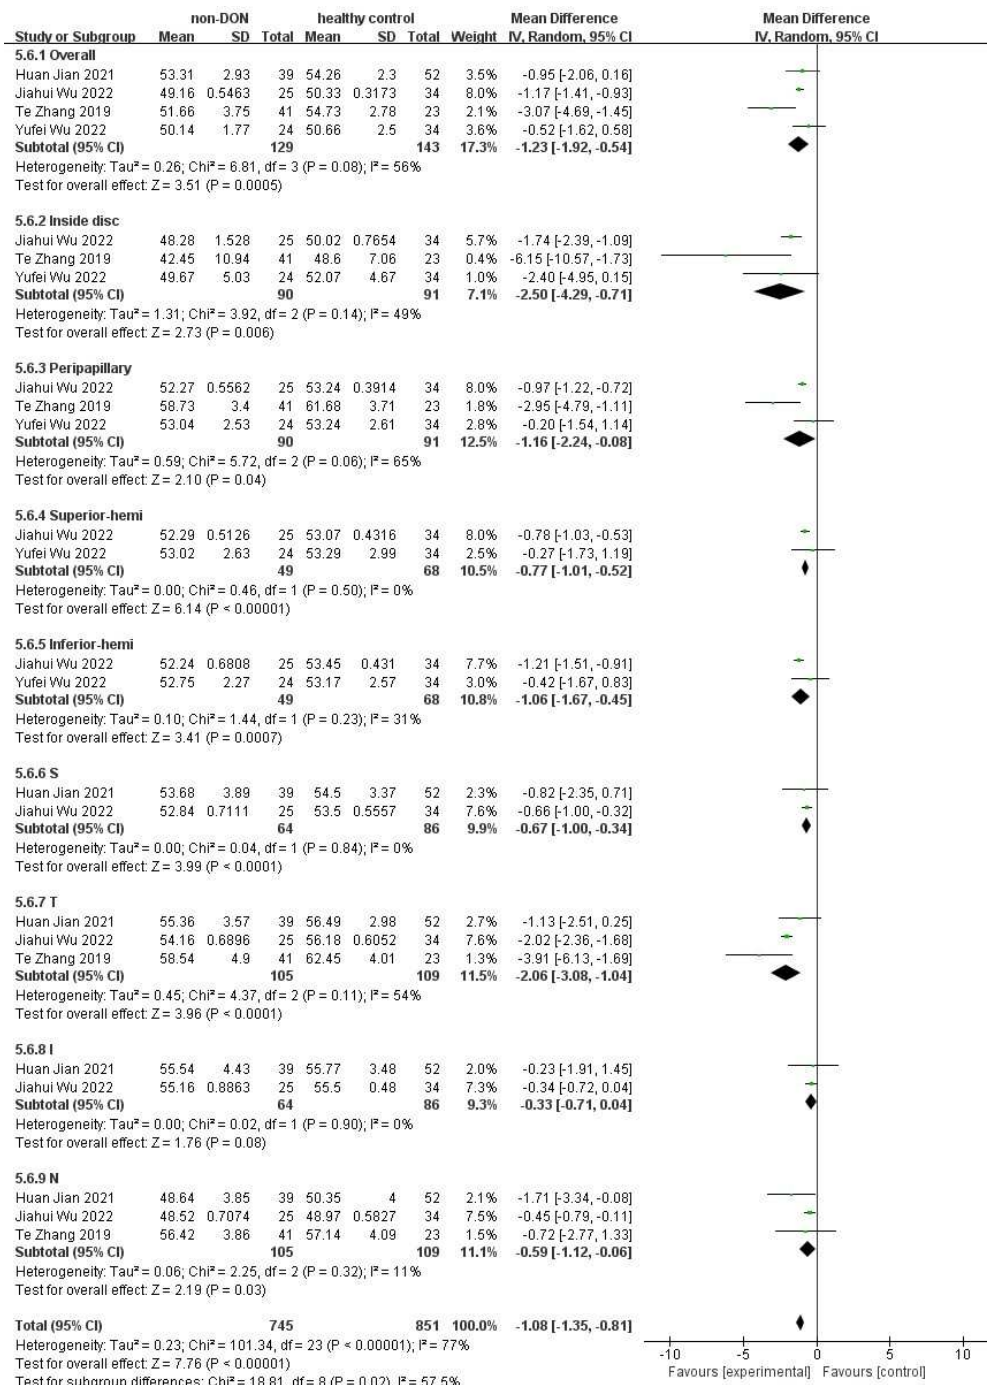

Fig S43. Forest plot of RPC-VD between HC and non-DON in OCTA of Southeast Asian

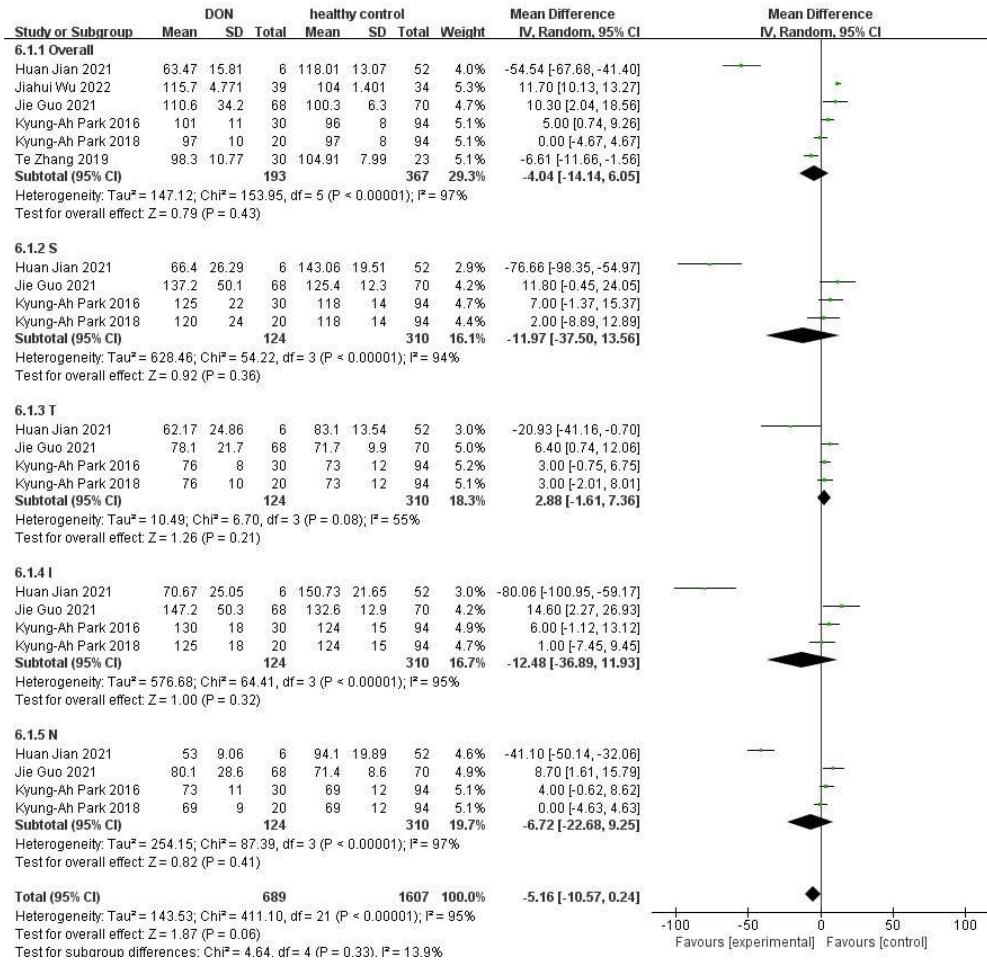

Fig S44. Forest plot of PRNFL between HC and DON in OCT of Southeast Asian

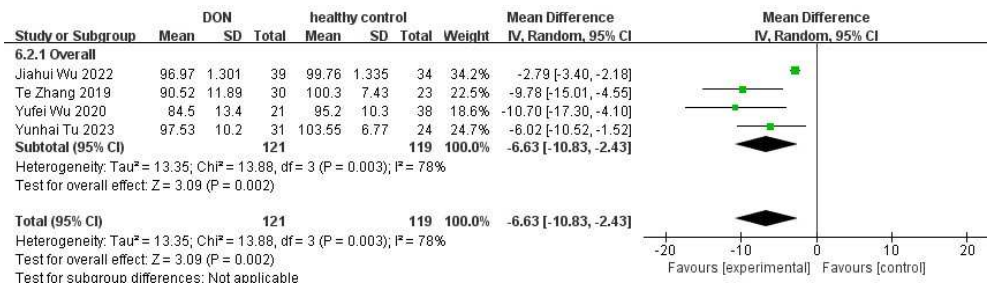

Fig S45. Forest plot of MGGCL between HC and DON in OCT of Southeast Asian

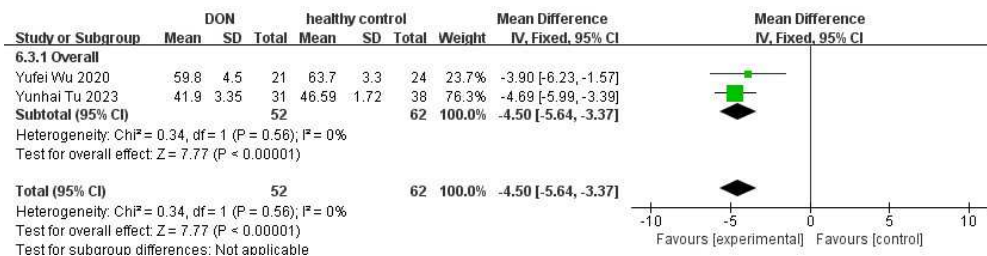

Fig S46. Forest plot of M-SRCL between HC and DON in OCTA of Southeast Asian

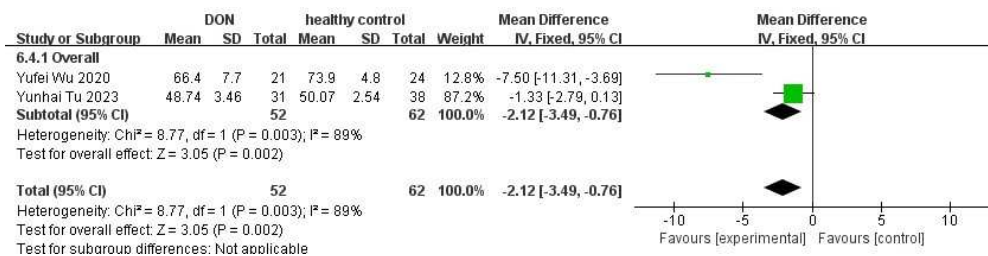

Fig S47. Forest plot of M-DRCL between HC and DON in OCTA of Southeast Asian

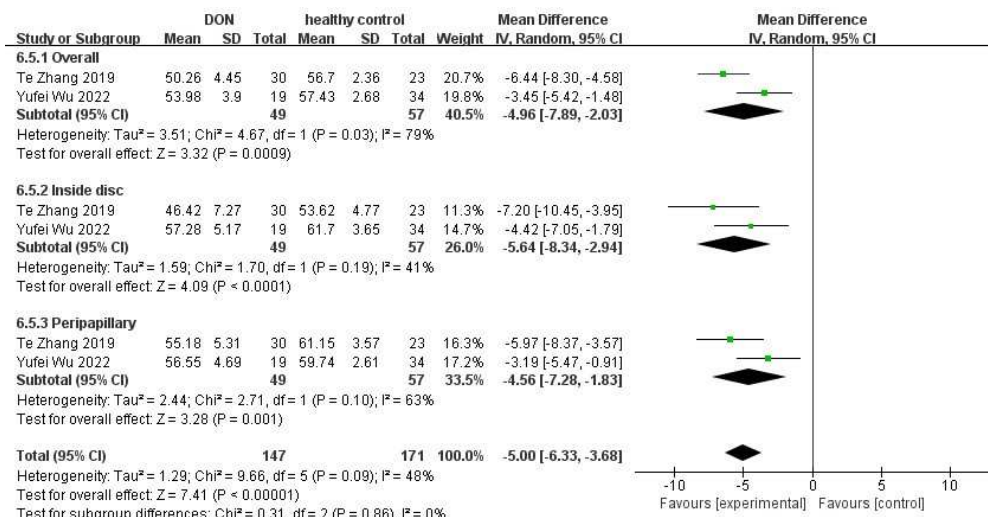

Fig S48. Forest plot of ONH-VD between HC and DON in OCTA of Southeast Asian

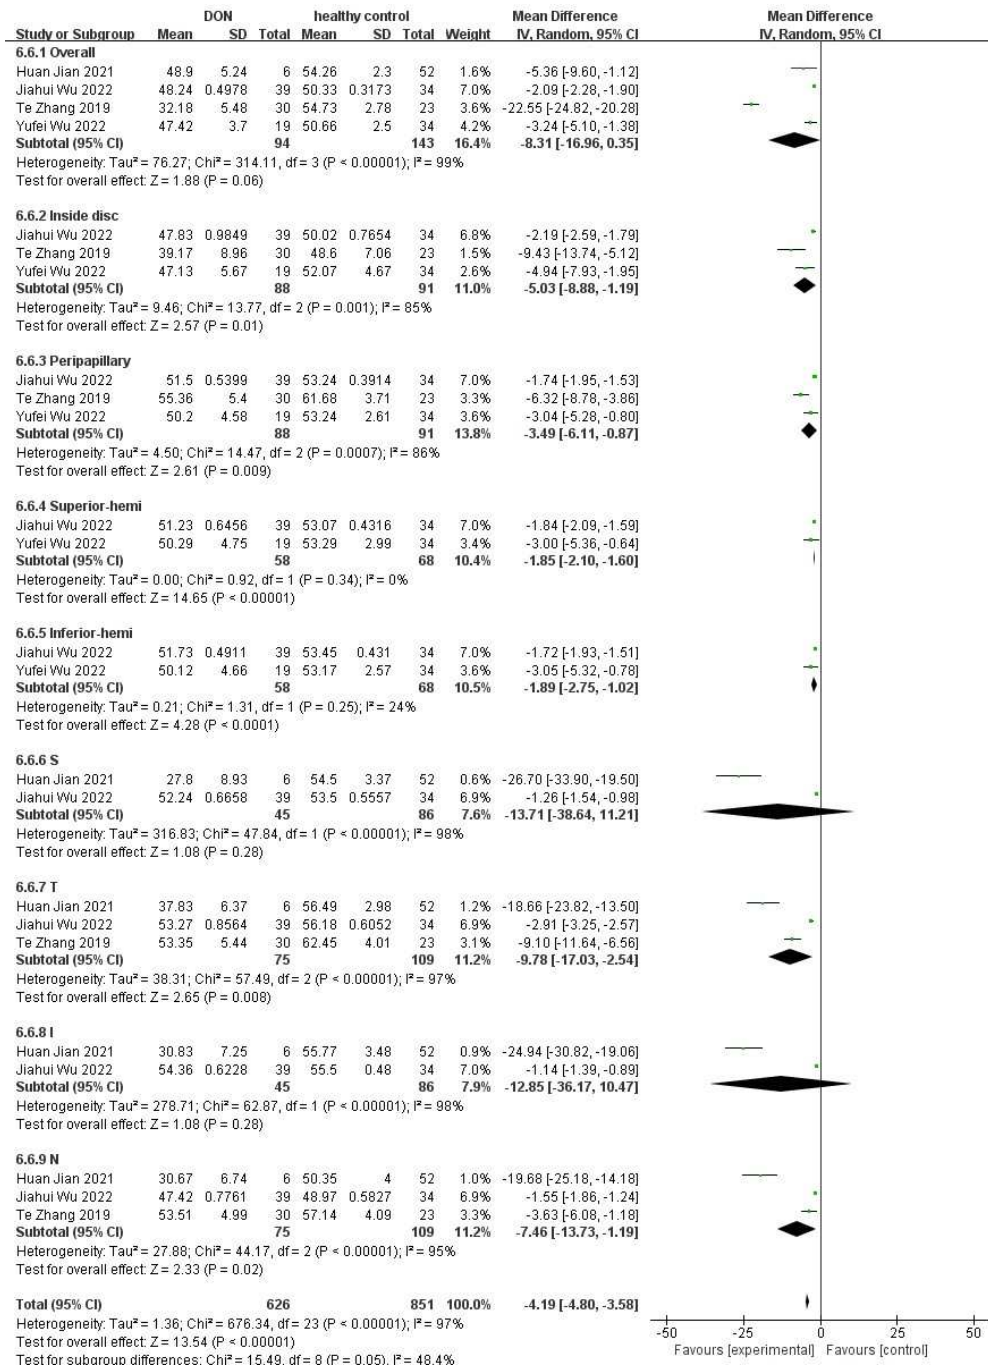

Fig S49. Forest plot of RPC-VD between HC and DON in OCTA of Southeast Asian

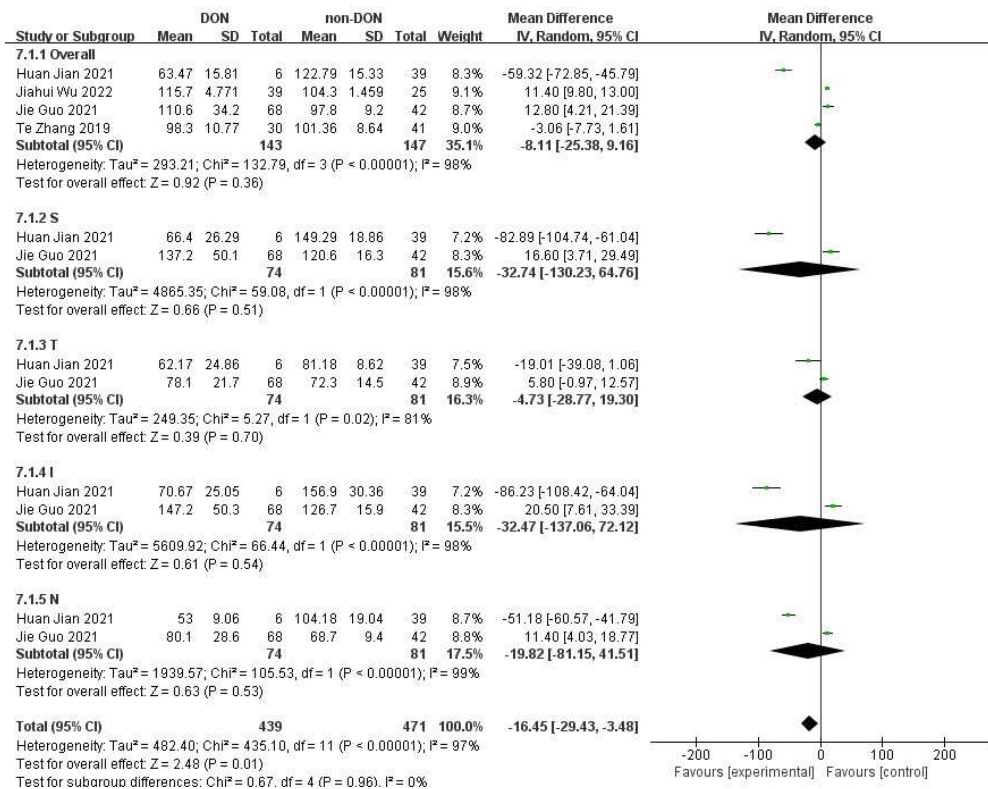

Fig S50. Forest plot of PRNFL between non-DON and DON in OCT of Southeast Asian

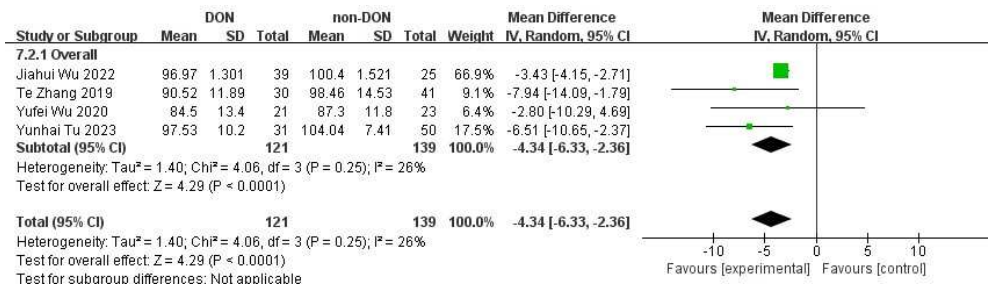

Fig S51. Forest plot of MGGC between non-DON and DON in OCT of Southeast Asian

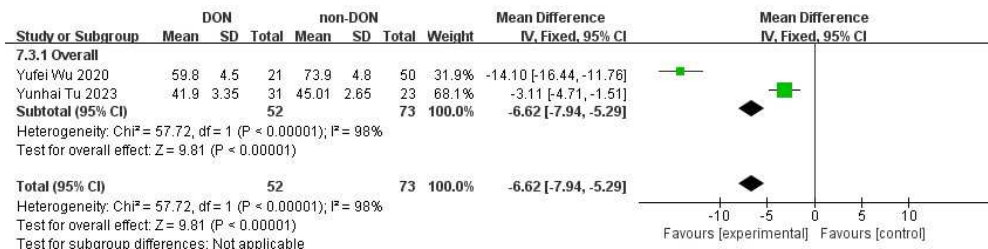

Fig S52. Forest plot of M-SRCL between non-DON and DON in OCTA of Southeast Asian



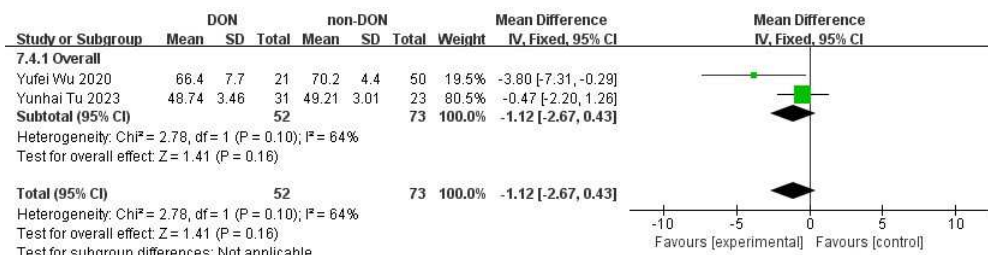

Fig S53. Forest plot of M-DRCL between non-DON and DON in OCTA of Southeast Asian

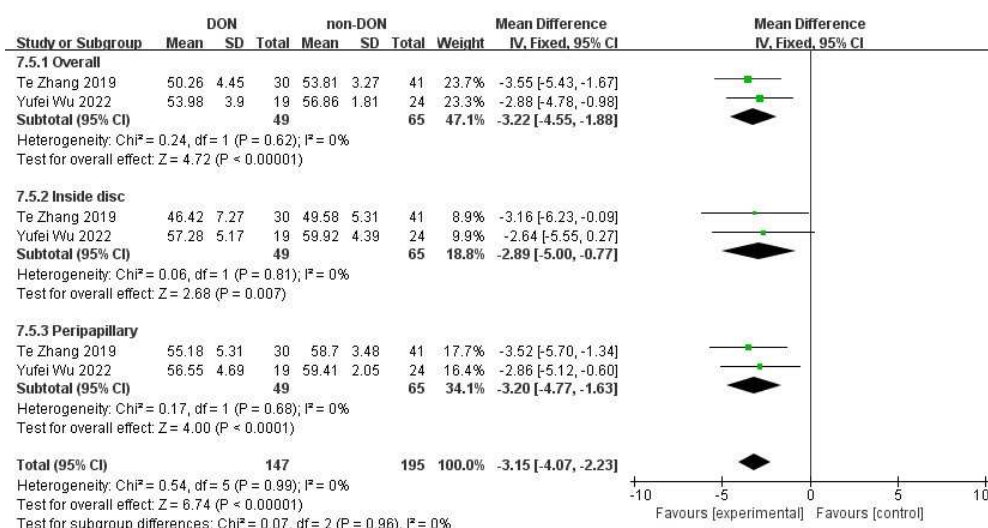

Fig S54. Forest plot of ONH-VD between non-DON and DON in OCTA of Southeast Asian

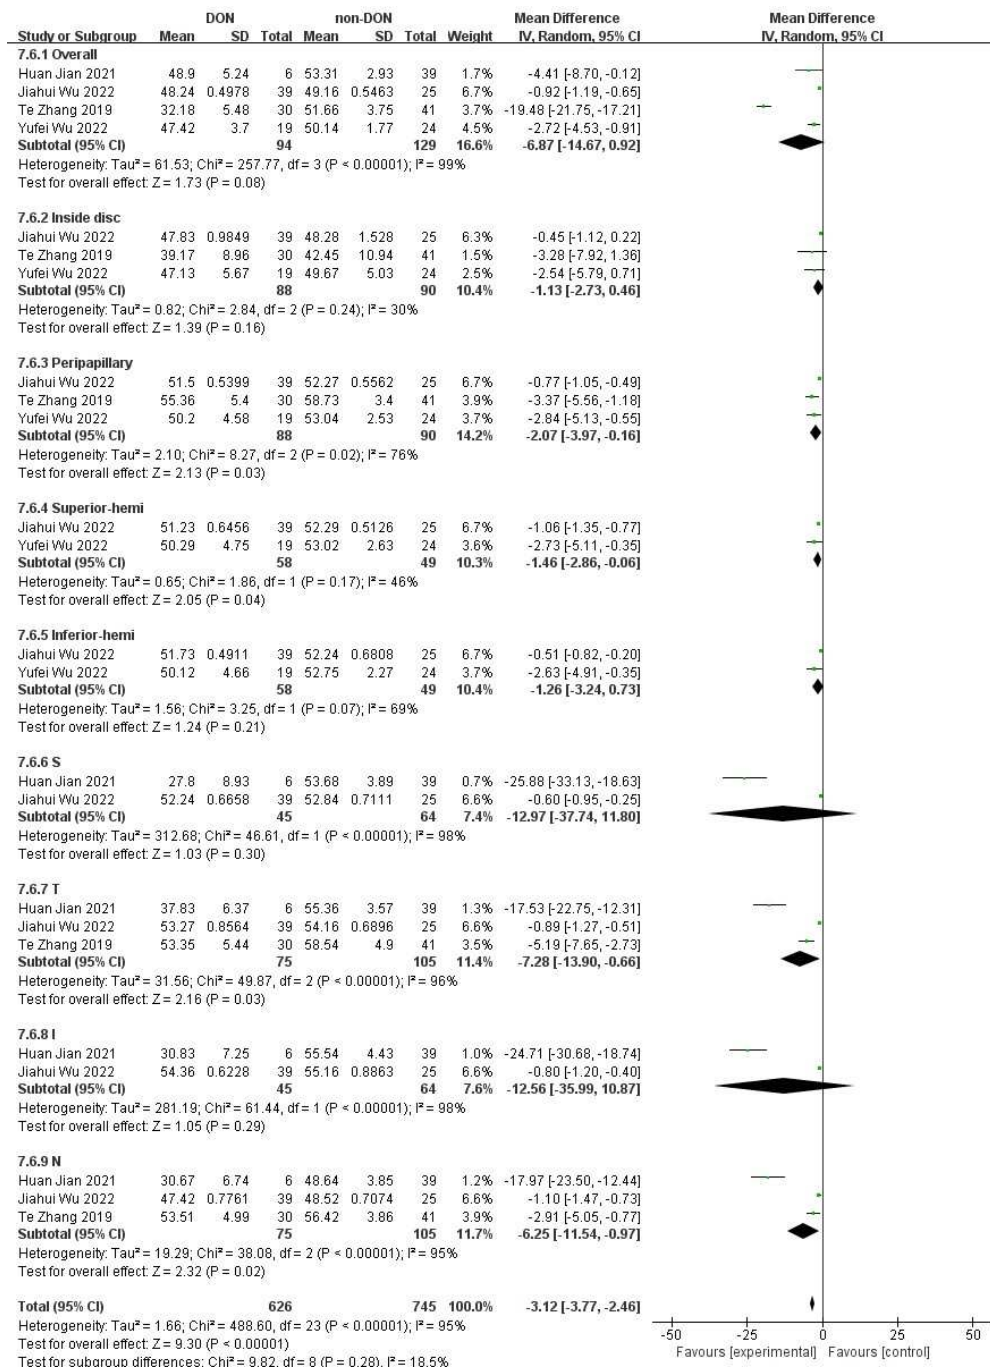

Fig S55. Forest plot of RPC-VD between non-DON and DON in OCTA of Southeast Asian

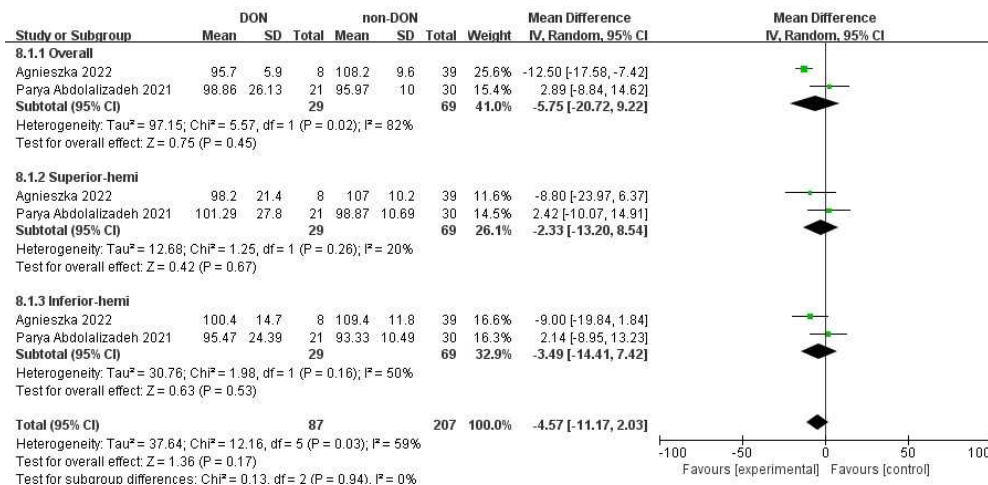

Fig S56. Forest plot of PRNFL between non-DON and DON in OCT of non-Southeast Asian

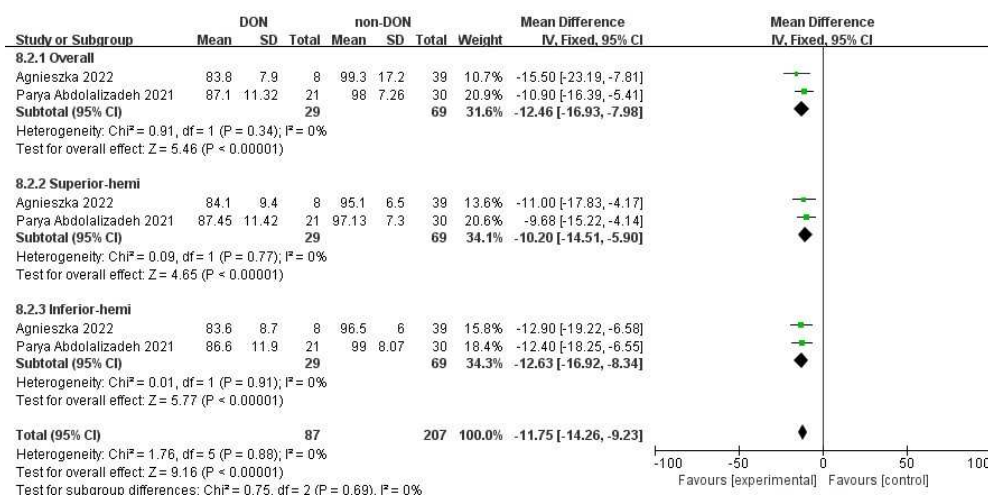

Fig S57. Forest plot of MGGC between non-DON and DON in OCT of non-Southeast Asian

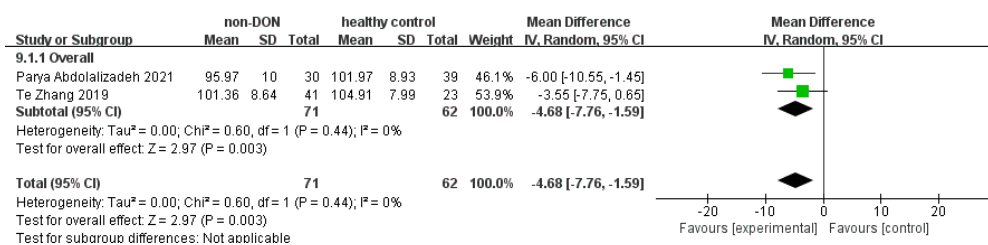

Fig S58. Forest plot of PRNFL between HC and non-DON in OCT of EUGOGO criteria

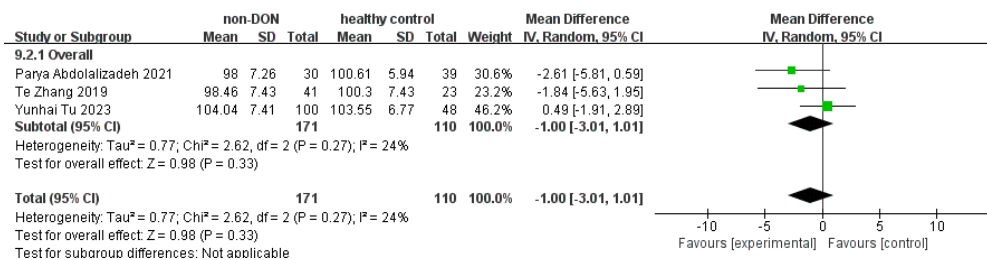

Fig S59. Forest plot of MGGC between HC and non-DON in OCT of EUGOGO criteria

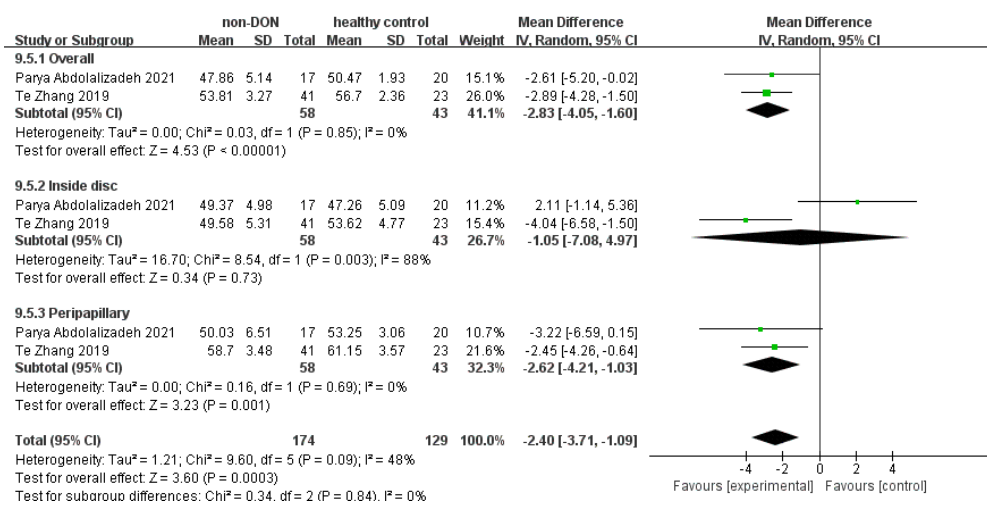

Fig S60. Forest plot of ONH-VD between HC and non-DON in OCT of EUGOGO criteria

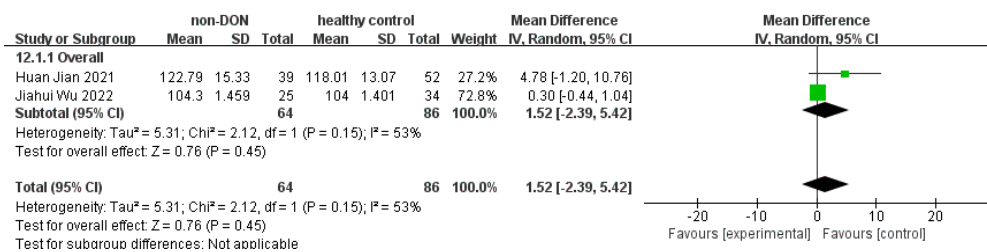

Fig S61. Forest plot of PRNFL between HC and non-DON in OCT of Bartley criteria

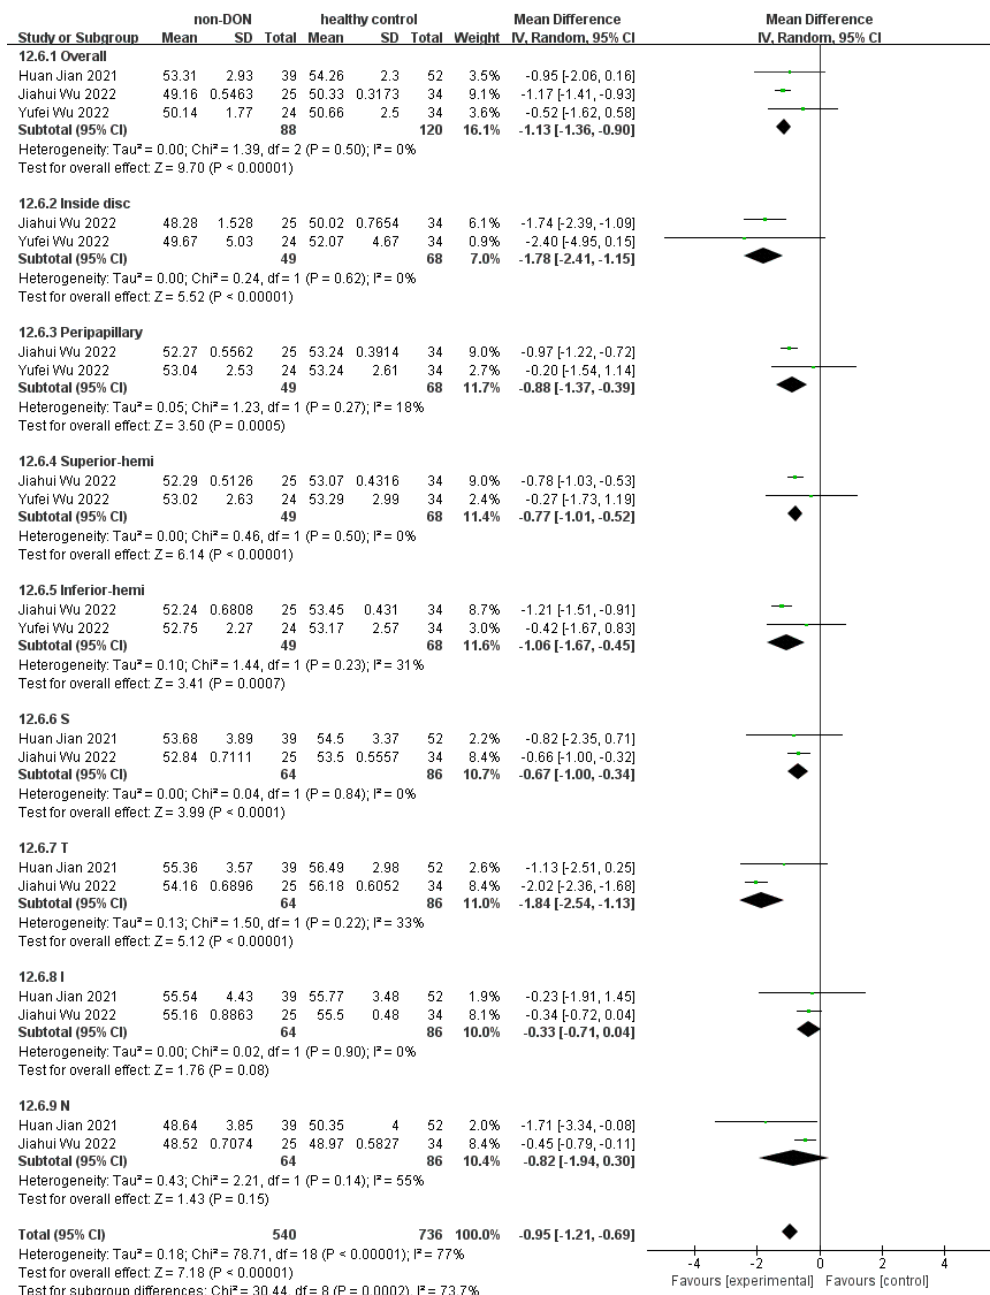

Fig S62. Forest plot of RPC-VD between HC and non-DON in OCT of Bartley criteria

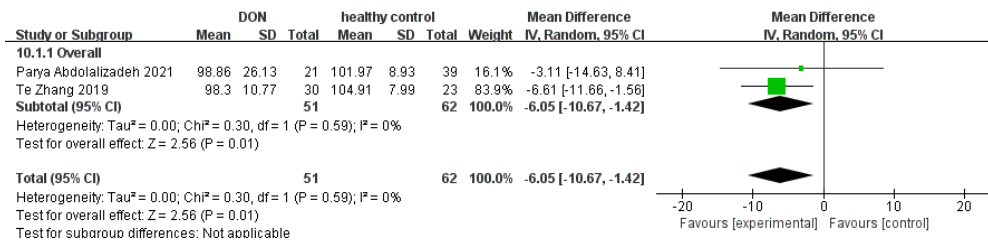

Fig S63. Forest plot of PRNFL between HC and DON in OCT of EUGOGO criteria

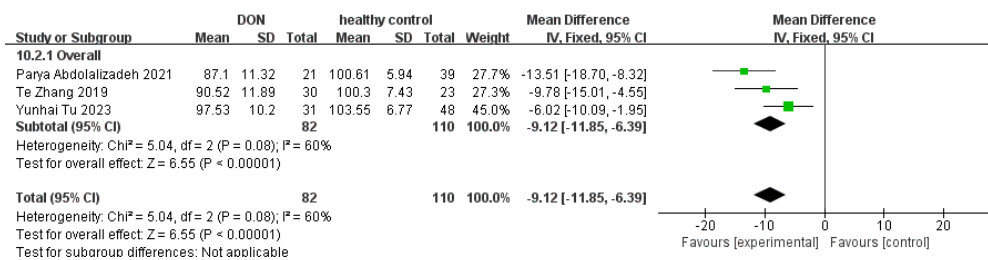

Fig S64. Forest plot of MGGC between HC and DON in OCT of EUGOGO criteria

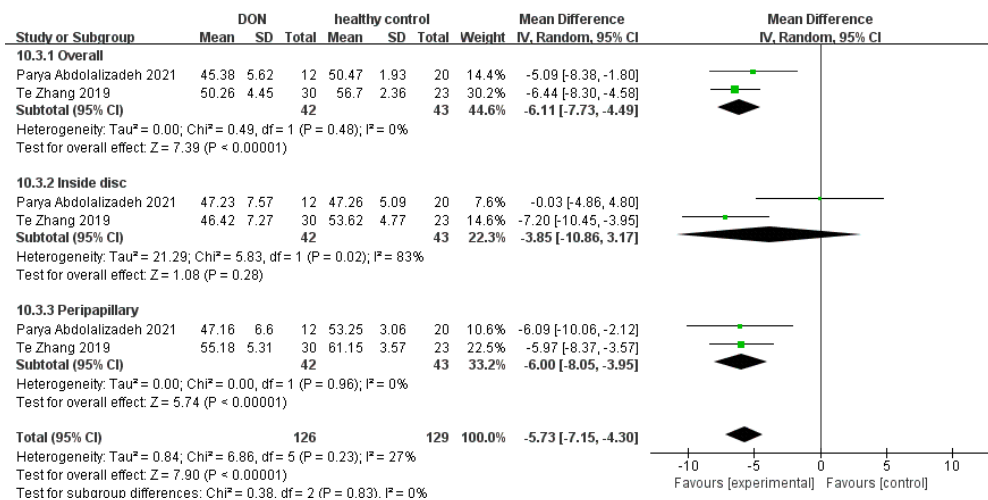

Fig S65. Forest plot of ONH-VD between HC and DON in OCT of EUGOGO criteria

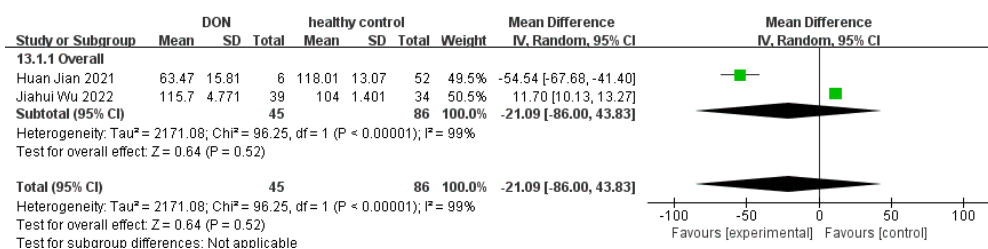

Fig S66. Forest plot of PRNFL between HC and DON in OCT of Bartley criteria

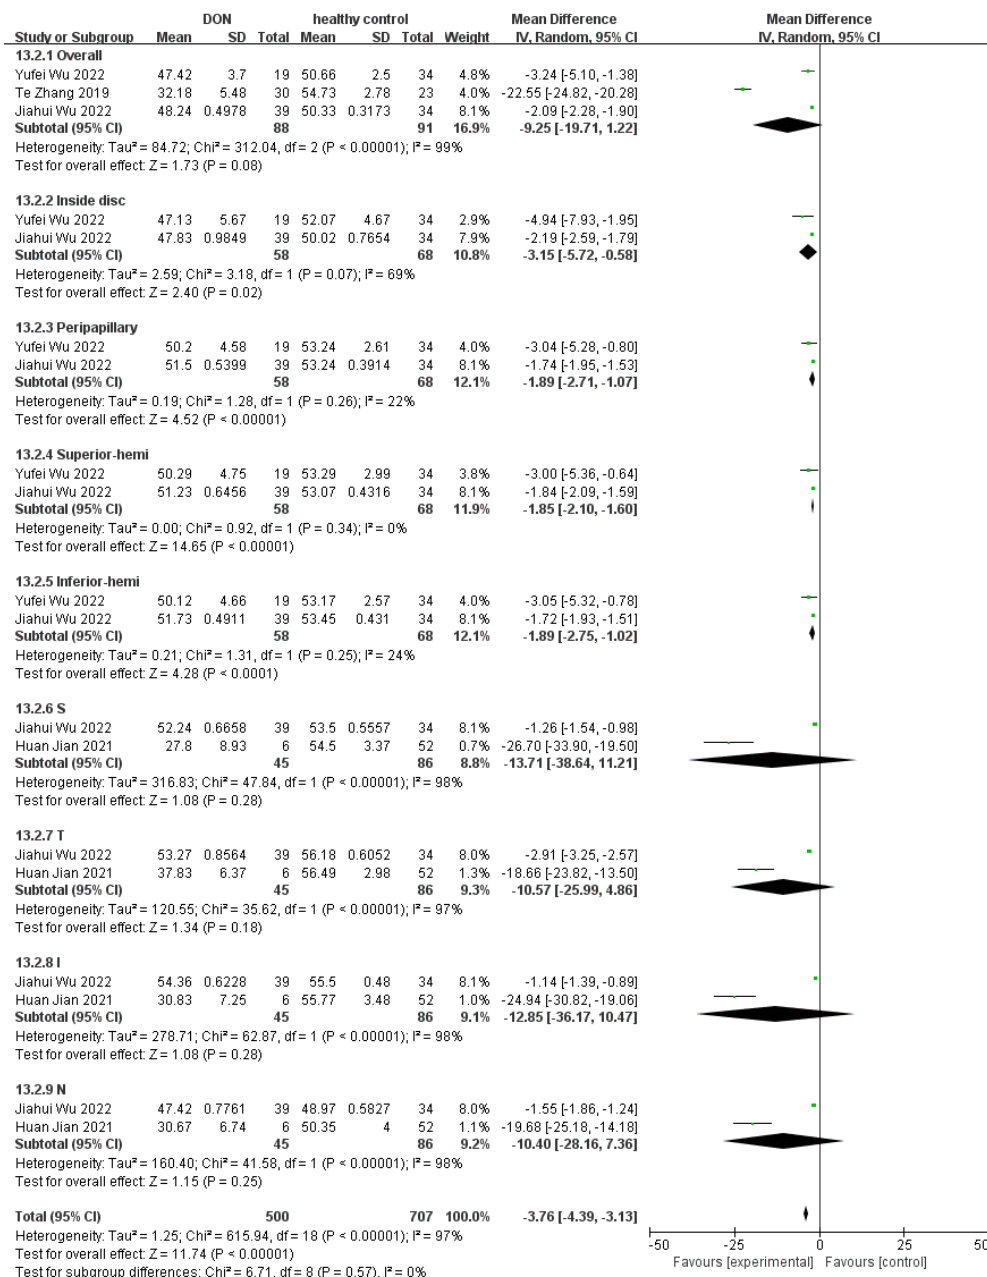

Fig S67. Forest plot of RPC-VD between HC and DON in OCTA of Bartley criteria

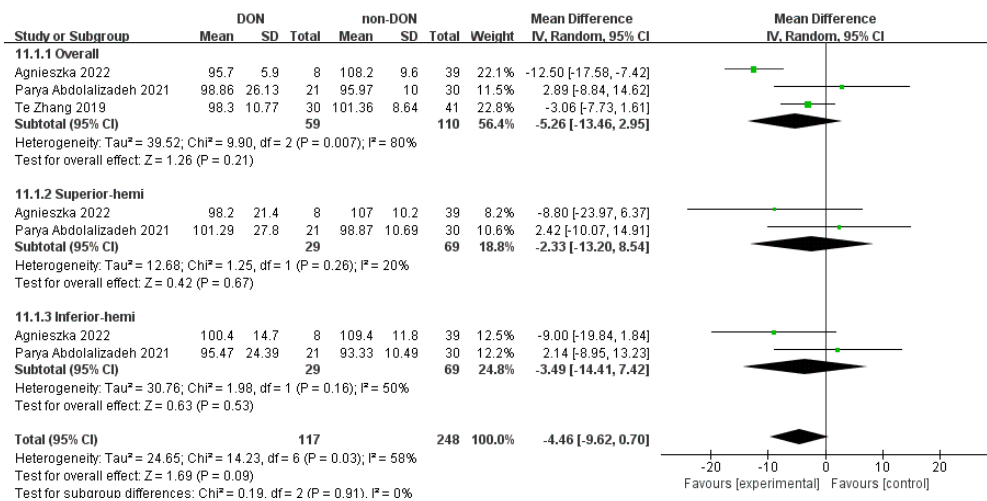

Fig S68. Forest plot of PRNFL between non-DON and DON in OCT of EUGOGO criteria

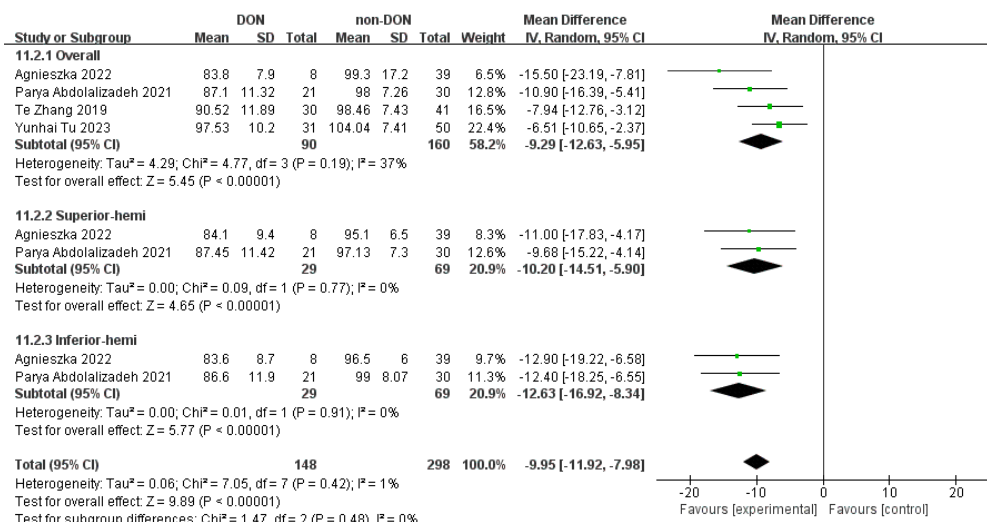

Fig S69. Forest plot of MGGC between non-DON and DON in OCT of EUGOGO criteria



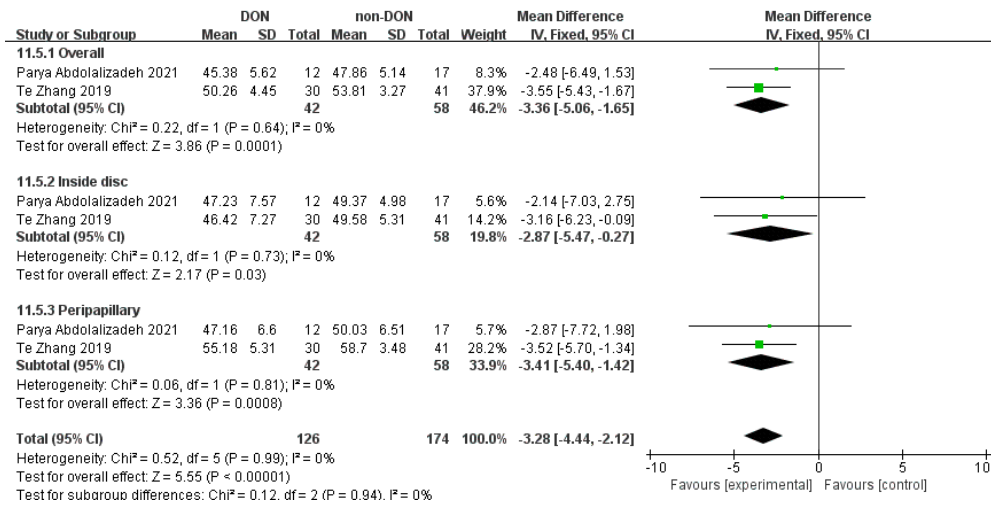

Fig S70. Forest plot of ONH-VD between non-DON and DON in OCT of EUGOGO criteria

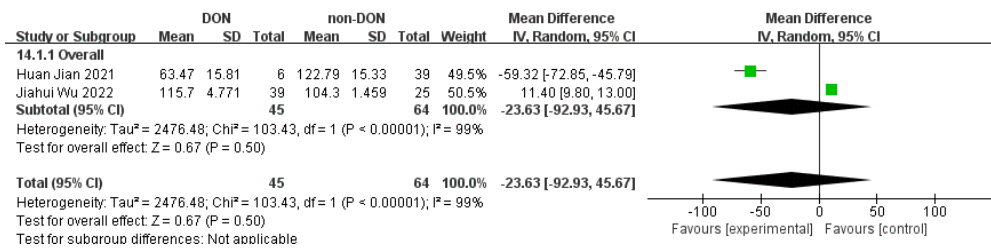

Fig S71. Forest plot of MGGC between non-DON and DON in OCT of Bartley criteria

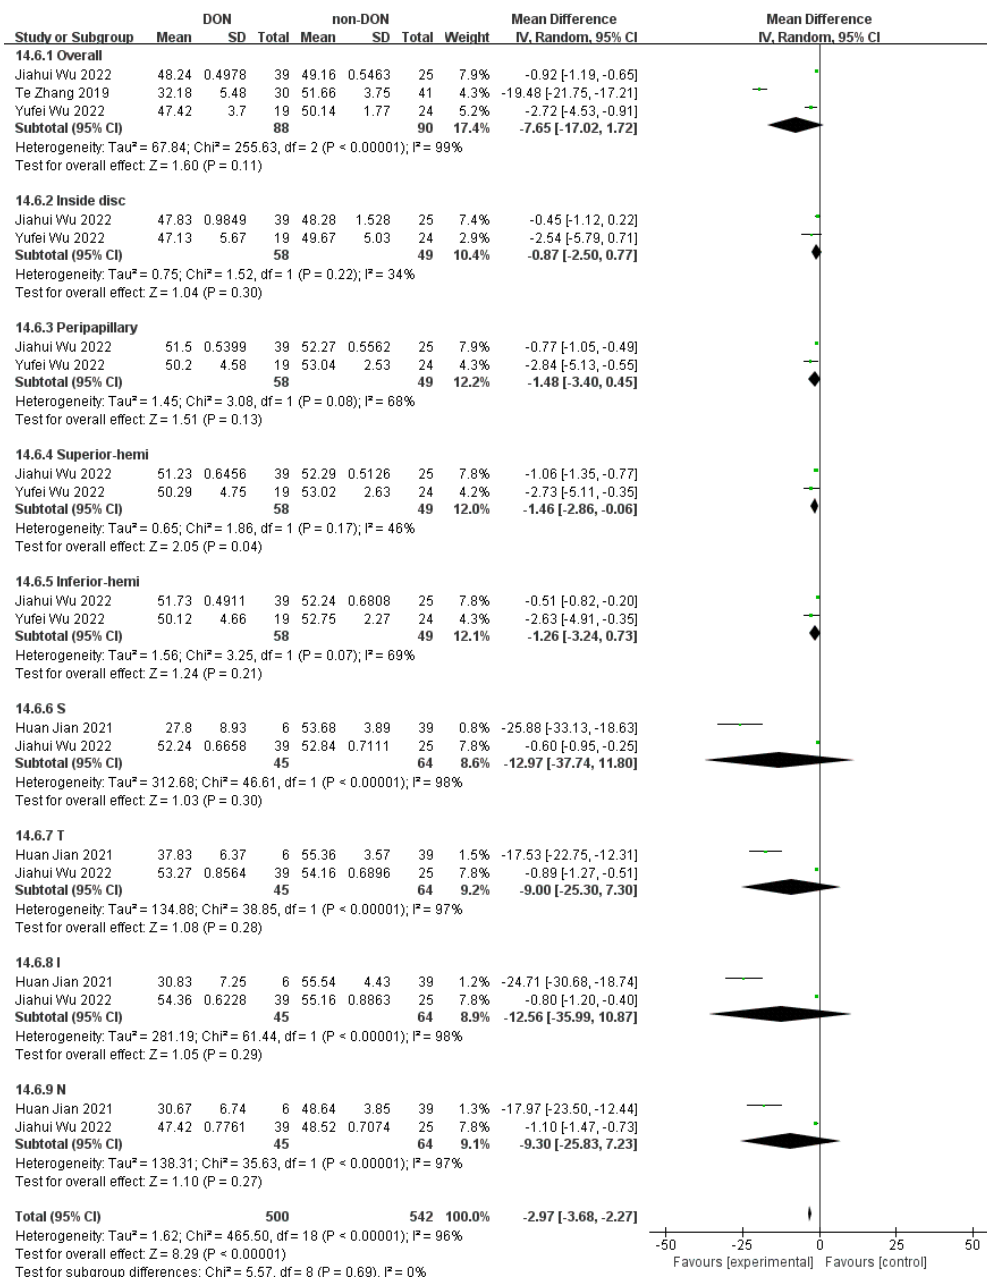

Fig S72. Forest plot of RPC-VD between non-DON and DON in OCT of Bartley criteria

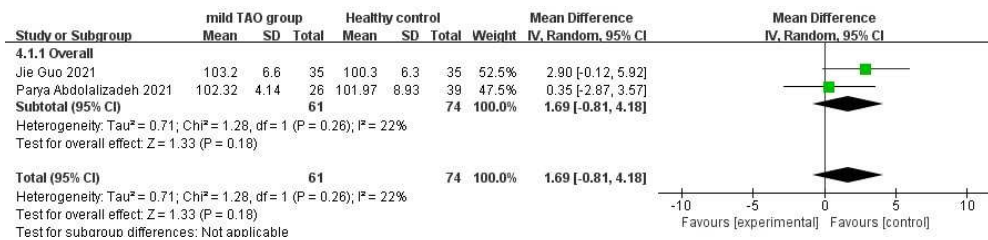

Fig S73. Forest plot of PRNFL between mild TAO group and HC in OCT

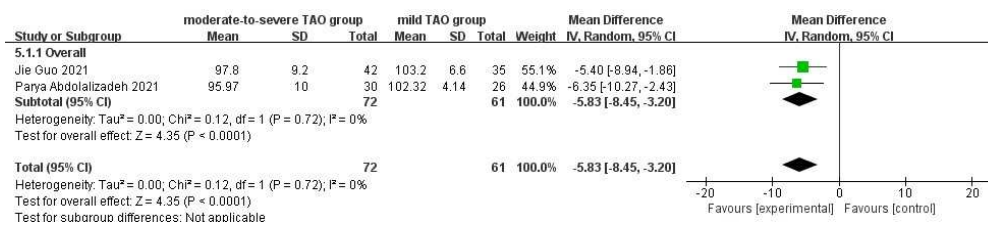

Fig S74. Forest plot of PRNFL between moderate-to-severe TAO group and mild TAO group in OCT

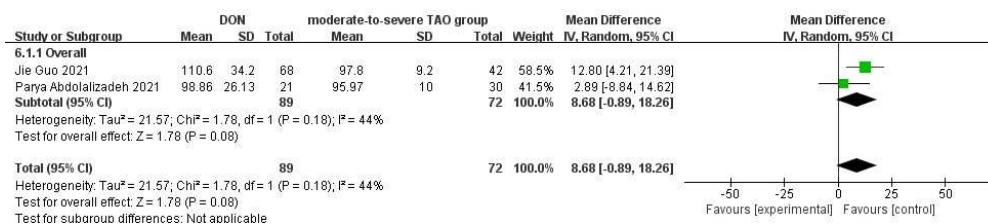

Fig S75. Forest plot of PRNFL between DON group and moderate-to-severe TAO group in OCT

HC: healthy control; non-DON: thyroid-associated ophthalmopathy without DON; DON: dysthyroid optic neuropathy

CAS: clinical activity scores; VA: visual acuity; IOP: intraocular pressure; VF-MD: visual field mean deviation; VF-PSD: visual field pattern standard deviation

PRNFL: peripapillary retinal nerve fiber layer; MGCCL: macular ganglion cell complex layer; GCL+IPL: ganglion cell layer and inner plexiform layer

ONH-VD: optic nerve head vessel density; RPC-VD: radial peripapillary capillary vessel density; RCL: retinal capillary layer; M-SRCL: macular superficial retinal capillary layer; M-DRCL: macular deep retinal capillary layer

S: superior; T: temporal; I: inferior; N: nasal; Superior-hemi: superior hemifield; Inferior-hemi: inferior hemifield; Superior-hemi: superior hemifield; Inferior-hemi: inferior hemifield;
